# Supplementary material
Source: PubMed Central journal article supplement (PMC2976581)

## Supporting Information

### Use of *N*-Methylformamide as a Solvent in Indium Promoted Barbier Reactions *En Route* to Ene-diyne and Epoxydiyne Formation: Comparison of Rate and Stereoselectivity in C-C Bond Forming Reactions with Water

Kwame Frimpong, Joseph Wzorek, Claire Lawlor, Katharine Spencer, and Thomas Mitzel\*

Department of Chemistry, Trinity College, 300 Summit Street, Hartford, CT 06106  
[thomas.mitzel@trincoll.edu](mailto:thomas.mitzel@trincoll.edu)

#### Table of Contents

|                                          |     |
|------------------------------------------|-----|
| General Experimental Methods.....        | S3  |
| Proton NMR for I.a.1.....                | S4  |
| Carbon NMR for I.a.1.....                | S5  |
| Proton NMR for I.a.2 (syn-isomer).....   | S6  |
| Carbon NMR for I.a.2 (syn-isomer).....   | S7  |
| Proton NMR for I.a.2 (anti-isomer).....  | S8  |
| Carbon NMR for I.a.2 (anti-isomer).....  | S9  |
| Proton NMR for I.a.3 (syn-isomer).....   | S10 |
| Carbon NMR for I.a.3 (syn-isomer).....   | S11 |
| Proton NMR for I.a.3 (anti-isomer).....  | S12 |
| Carbon NMR for I.a.3 (anti-isomer).....  | S13 |
| Proton NMR for I.a.4.....                | S14 |
| Carbon NMR for I.a.4.....                | S15 |
| Proton NMR for II.a.1.....               | S16 |
| Carbon NMR for II.a.1.....               | S17 |
| Proton NMR for II.a.2 (syn-isomer).....  | S18 |
| Carbon NMR for II.a.2 (syn-isomer).....  | S19 |
| Proton NMR for II.a.2 (anti-isomer)..... | S20 |

|                                            |     |
|--------------------------------------------|-----|
| Carbon NMR for II.a.2 (anti-isomer).....   | S21 |
| Proton NMR for II.a.3 (syn-isomer).....    | S22 |
| Carbon NMR for II.a.3 (syn-isomer).....    | S23 |
| Proton NMR for II.a.3 (anti-isomer) .....  | S24 |
| Carbon NMR for II.a.3 (anti-isomer) .....  | S25 |
| Proton NMR for II.a.4 .....                | S26 |
| Carbon NMR for II.a.4 .....                | S27 |
| Proton NMR for III.a.1 .....               | S28 |
| Carbon NMR for III.a.1 .....               | S29 |
| Proton NMR for III.a.2 .....               | S30 |
| Carbon NMR for III.a.2.....                | S31 |
| Proton NMR for III.a.2 (anti-isomer) ..... | S32 |
| Carbon NMR for III.a.2 (anti-isomer) ..... | S33 |
| Proton NMR for III.a.3 .....               | S34 |
| Carbon NMR for III.a.3.....                | S35 |
| Proton NMR for III.a.3 (anti-isomer).....  | S36 |
| Carbon NMR for III.a.3 (anti-isomer).....  | S37 |
| Proton NMR for III.a.4 .....               | S38 |
| Carbon NMR for III.a.4 .....               | S39 |

### General Methods:

All spectra were obtained using a GE NMR with a tecmag upgrade.  $^1\text{H}$  NMR (300 MHz) and  $^{13}\text{C}$  NMR (75 MHz) were obtained in  $\text{CDCl}_3$  at room temperature. Chemical shifts are reported in parts per million upfield/downfield from  $\text{CDCl}_3$  ( $\delta$  7.26 ppm and 77.3 ppm) Tetramethylsilane was used as an internal standard ( $\delta$  0.00 ppm).

Nucleus H1  
 Obs.Freq 300.5216050  
 FREQU 4000.0  
 Acq. Points 8192  
 FT Points 8192  
 Acq. Time 2.048s  
 Last Delay 1s  
 Scans 1D 8  
 Scan Count 8  
 Dummy scan 0  
 RCVR gain 600  
 temp K 0.0  
 Sequence 1PULS  
 TX Power 63  
 PW01 5.5u  
 LB 1D 0.25  
 Phase 0 -37.64  
 Phase 1 -165.00

Compound 1.a.1

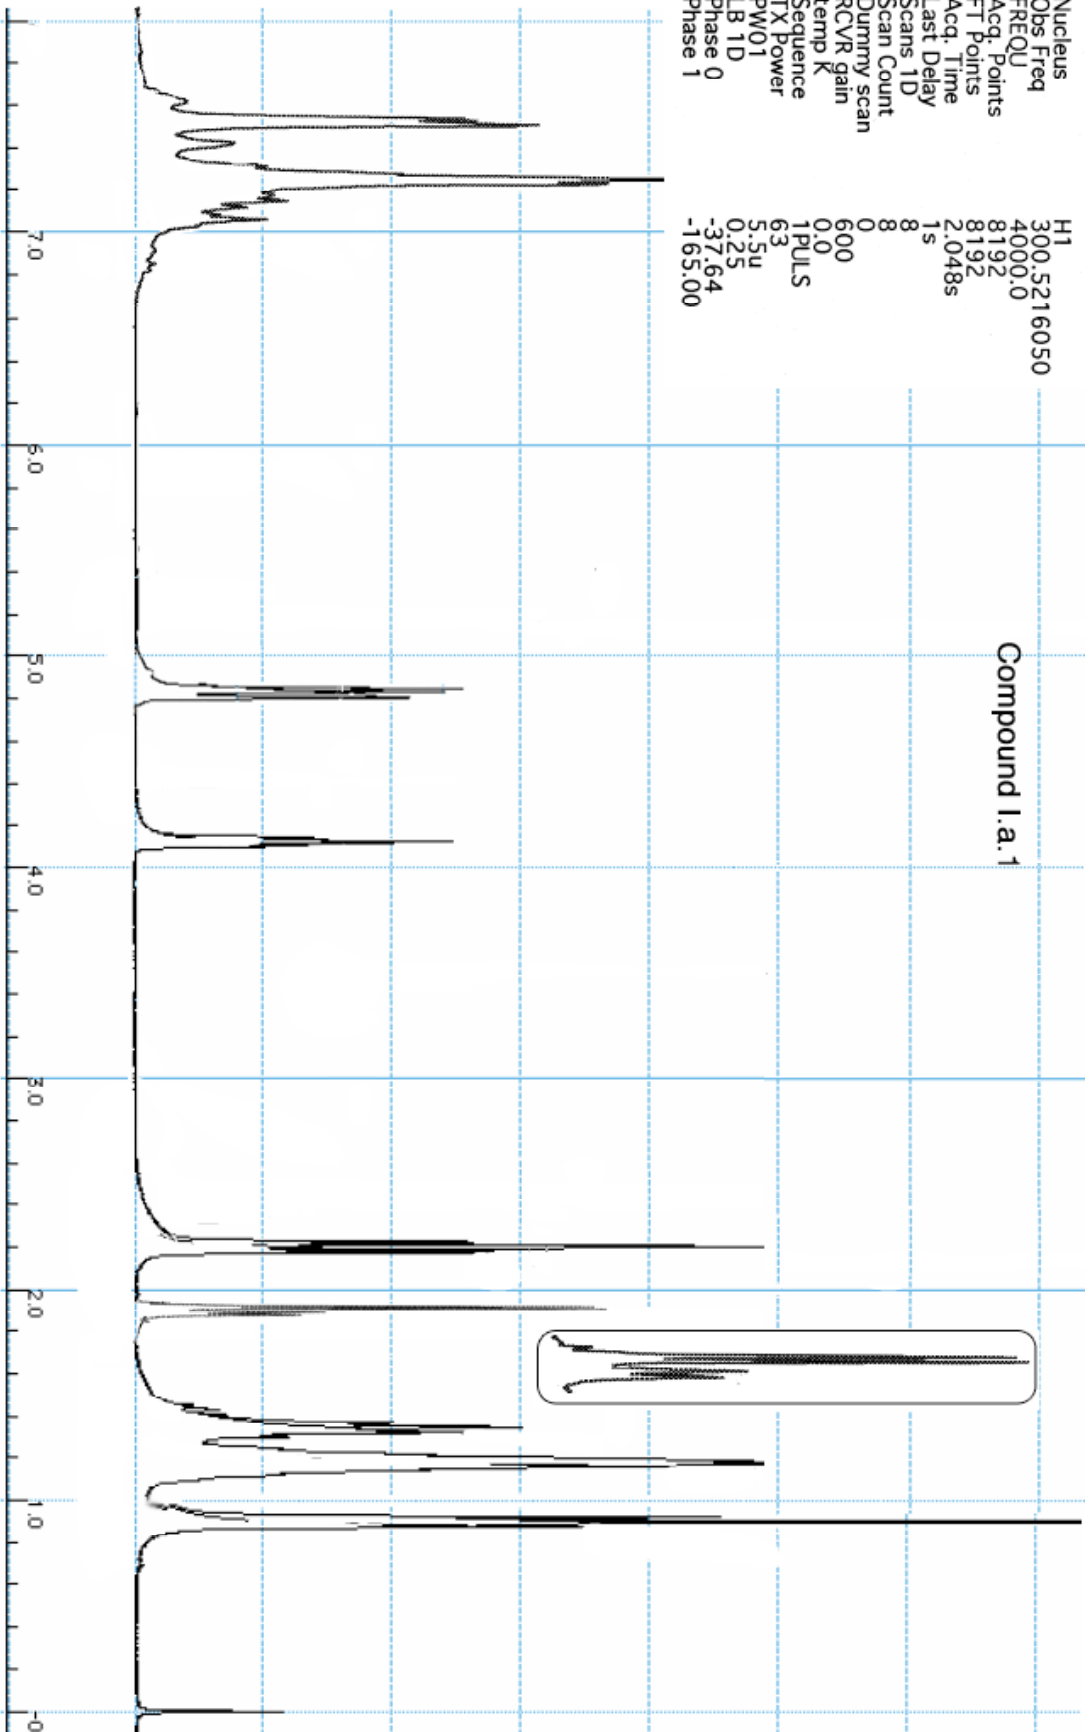

tecmaq

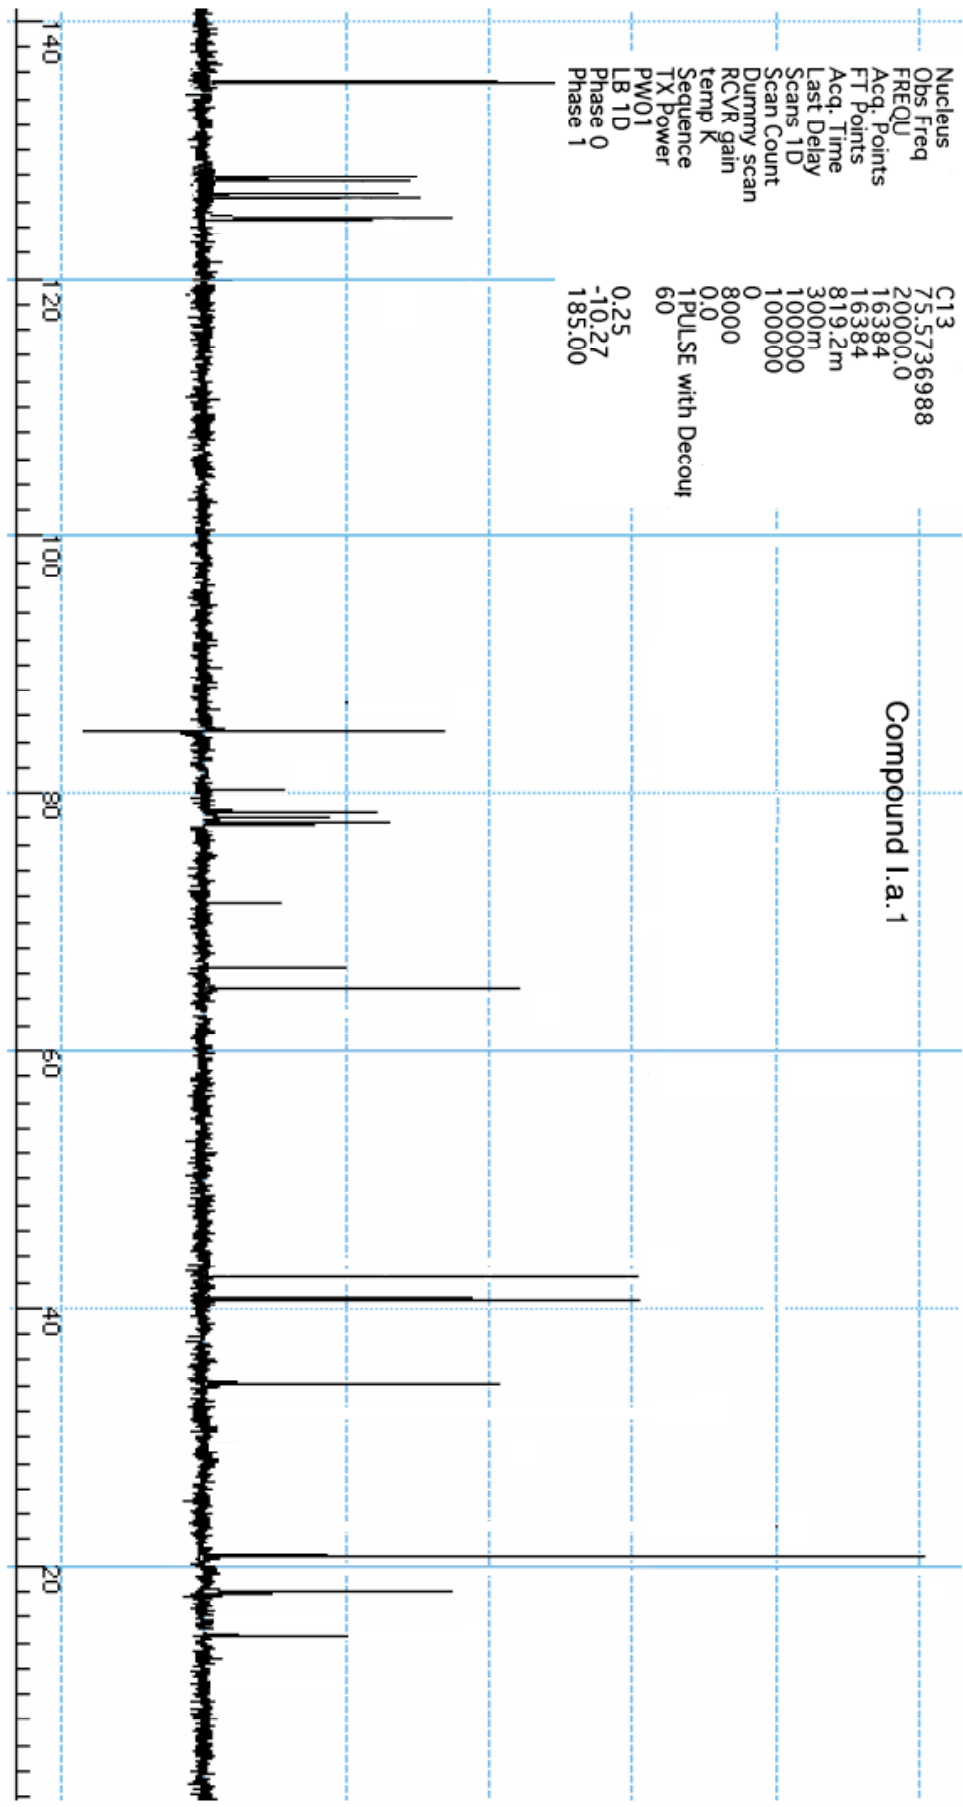

tecmag

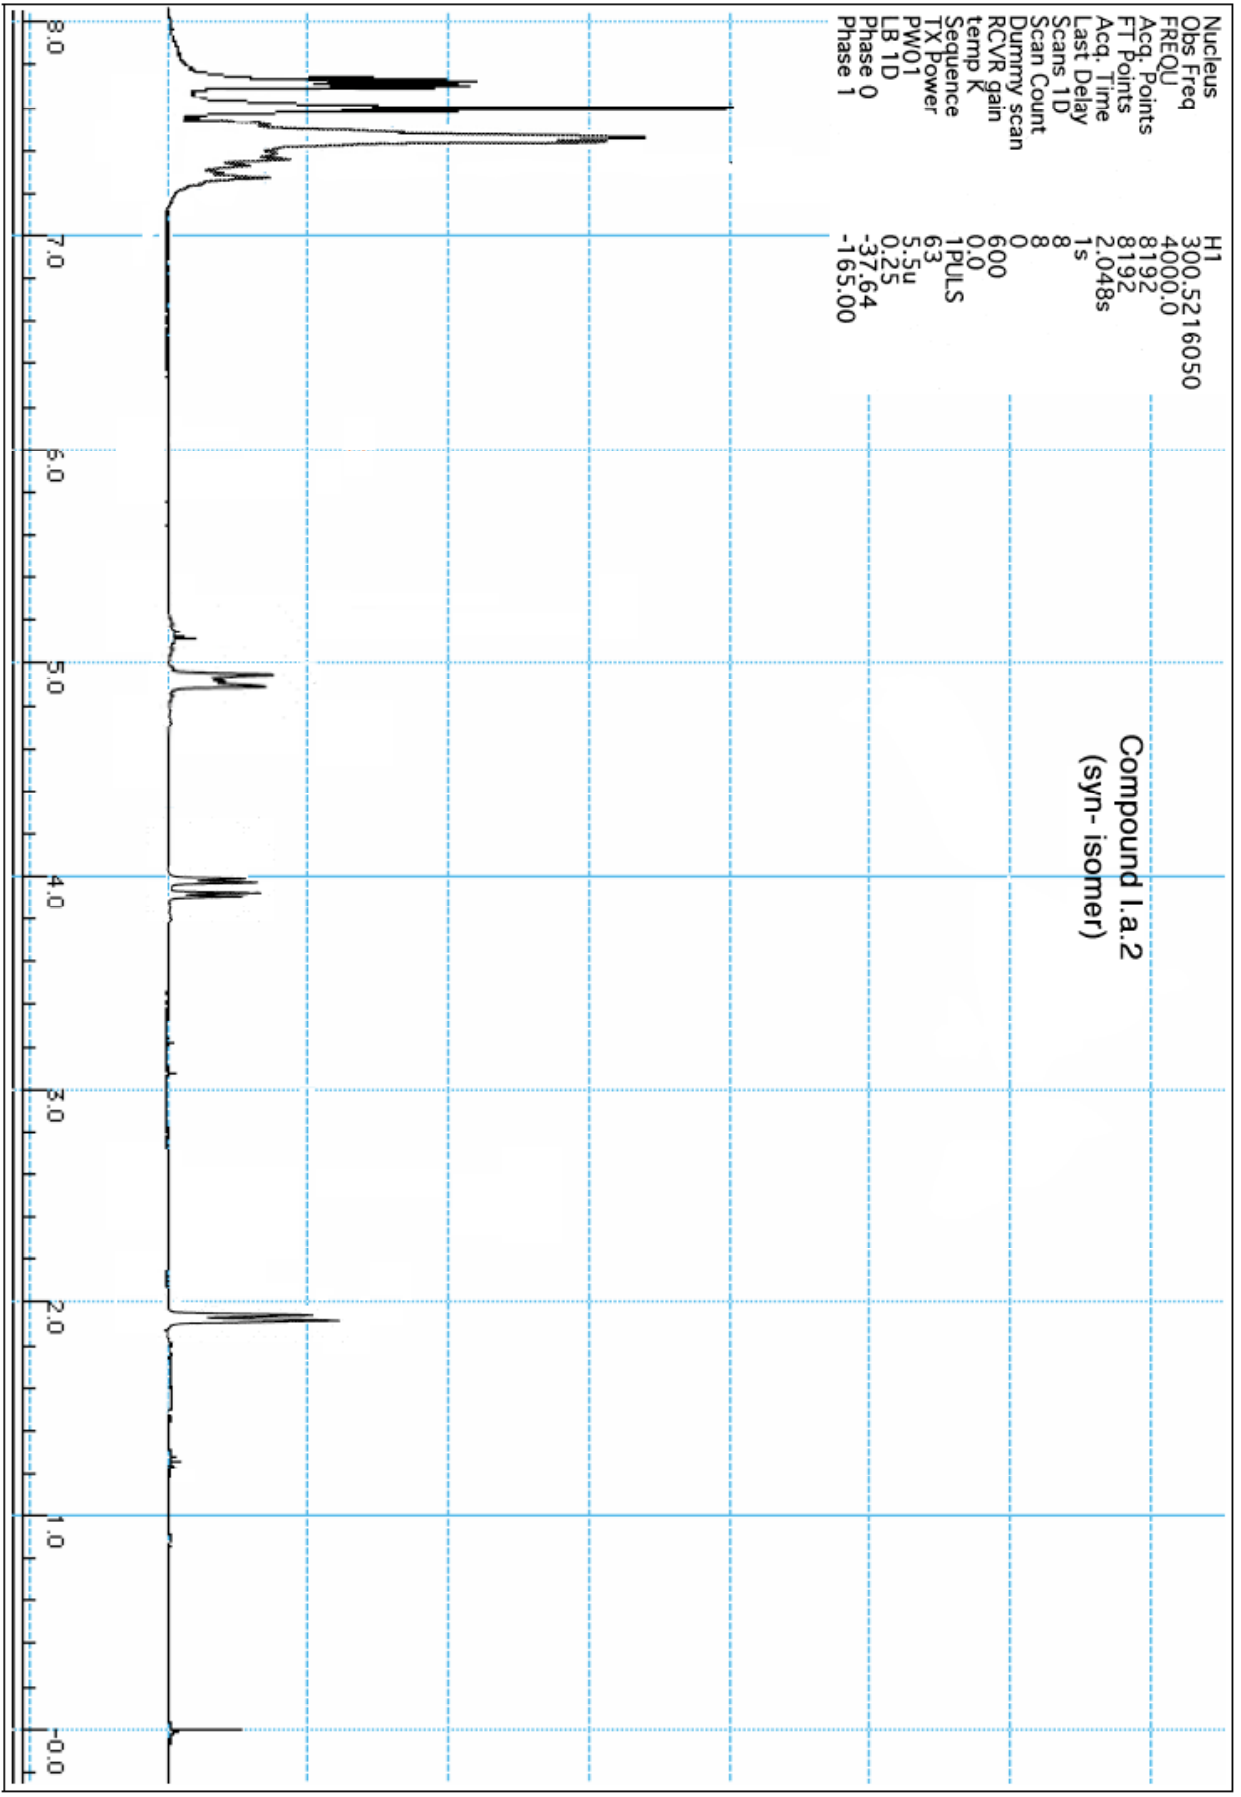

Compound I.a.2  
(syn-isomer)

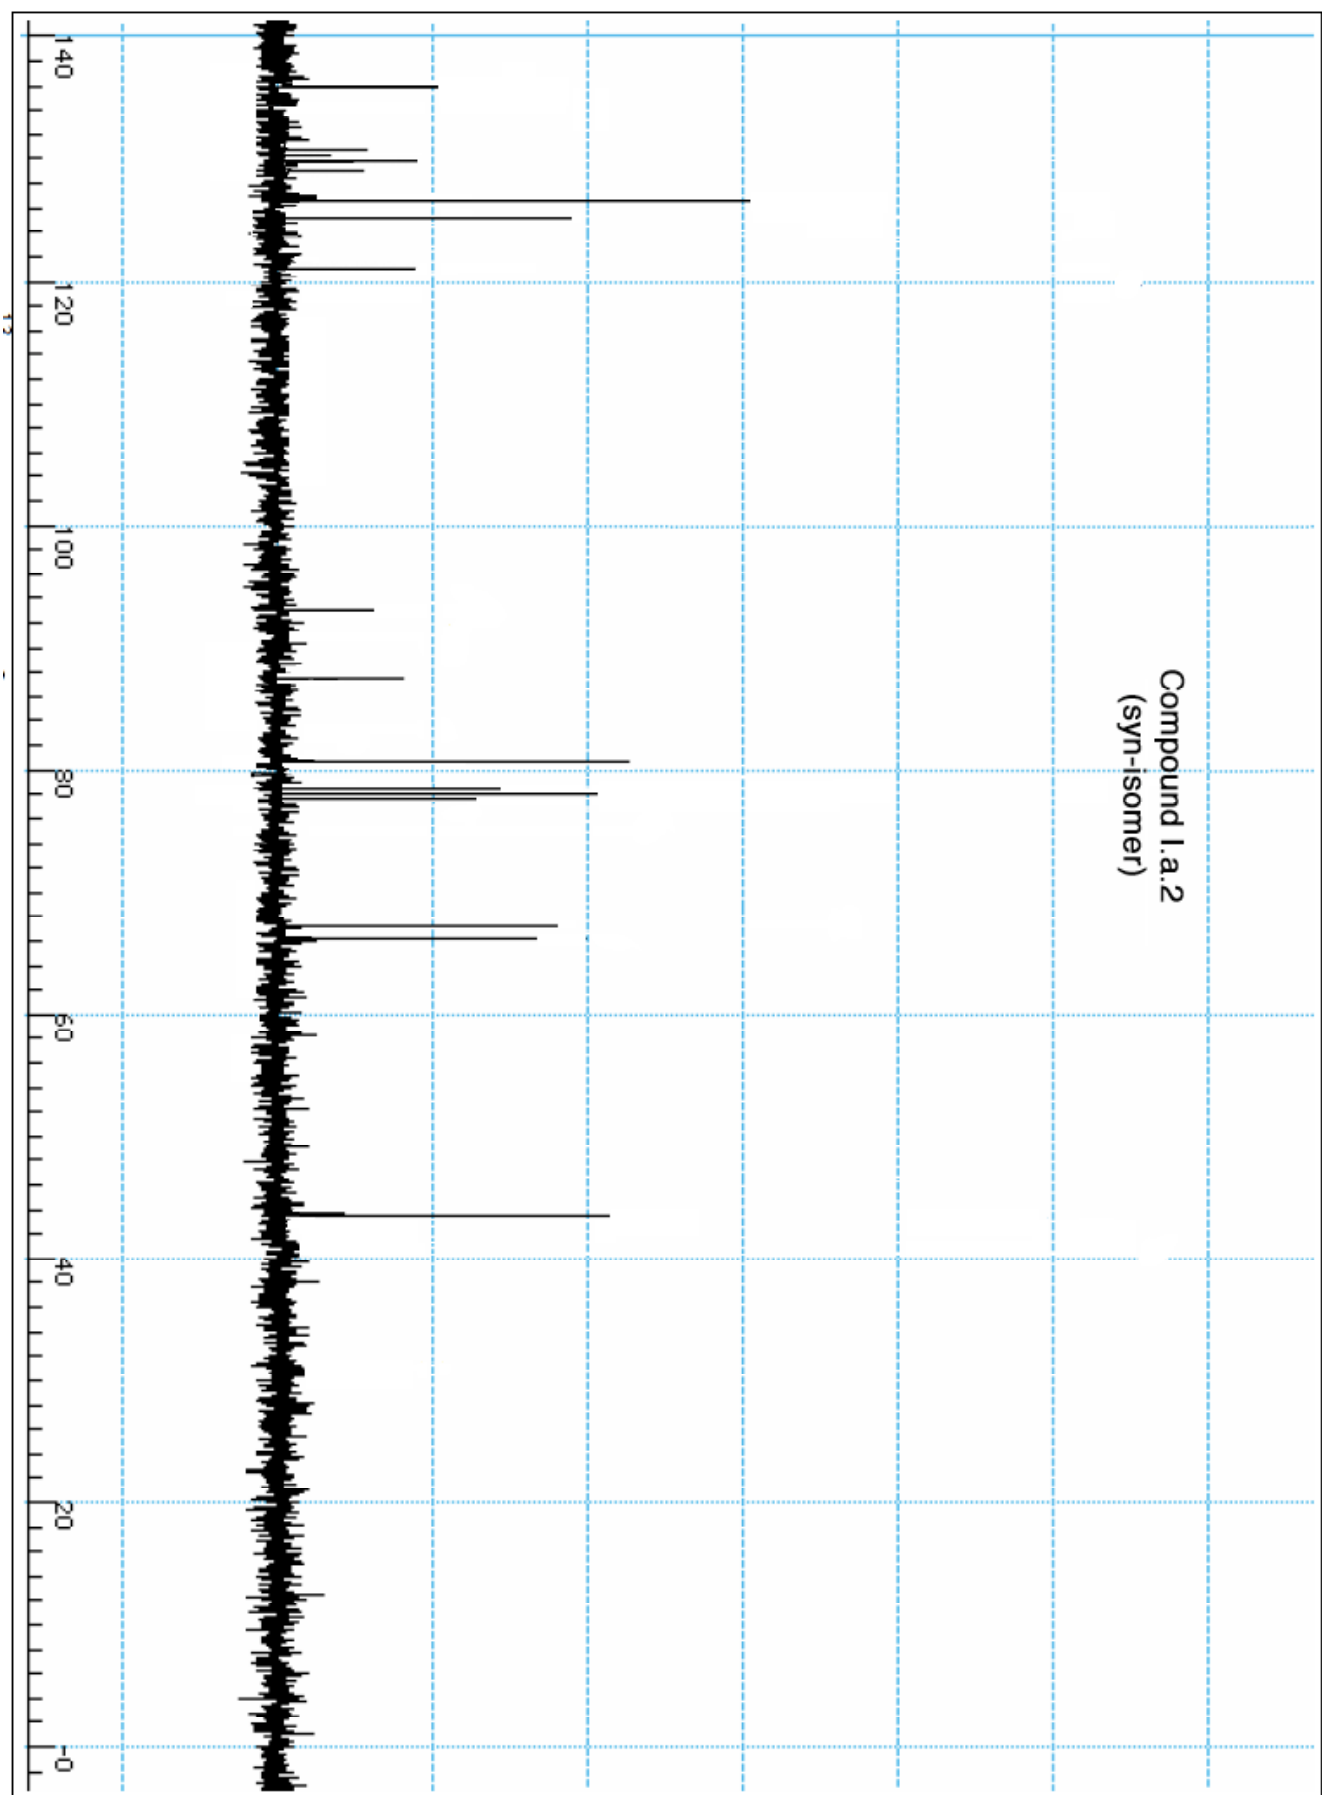

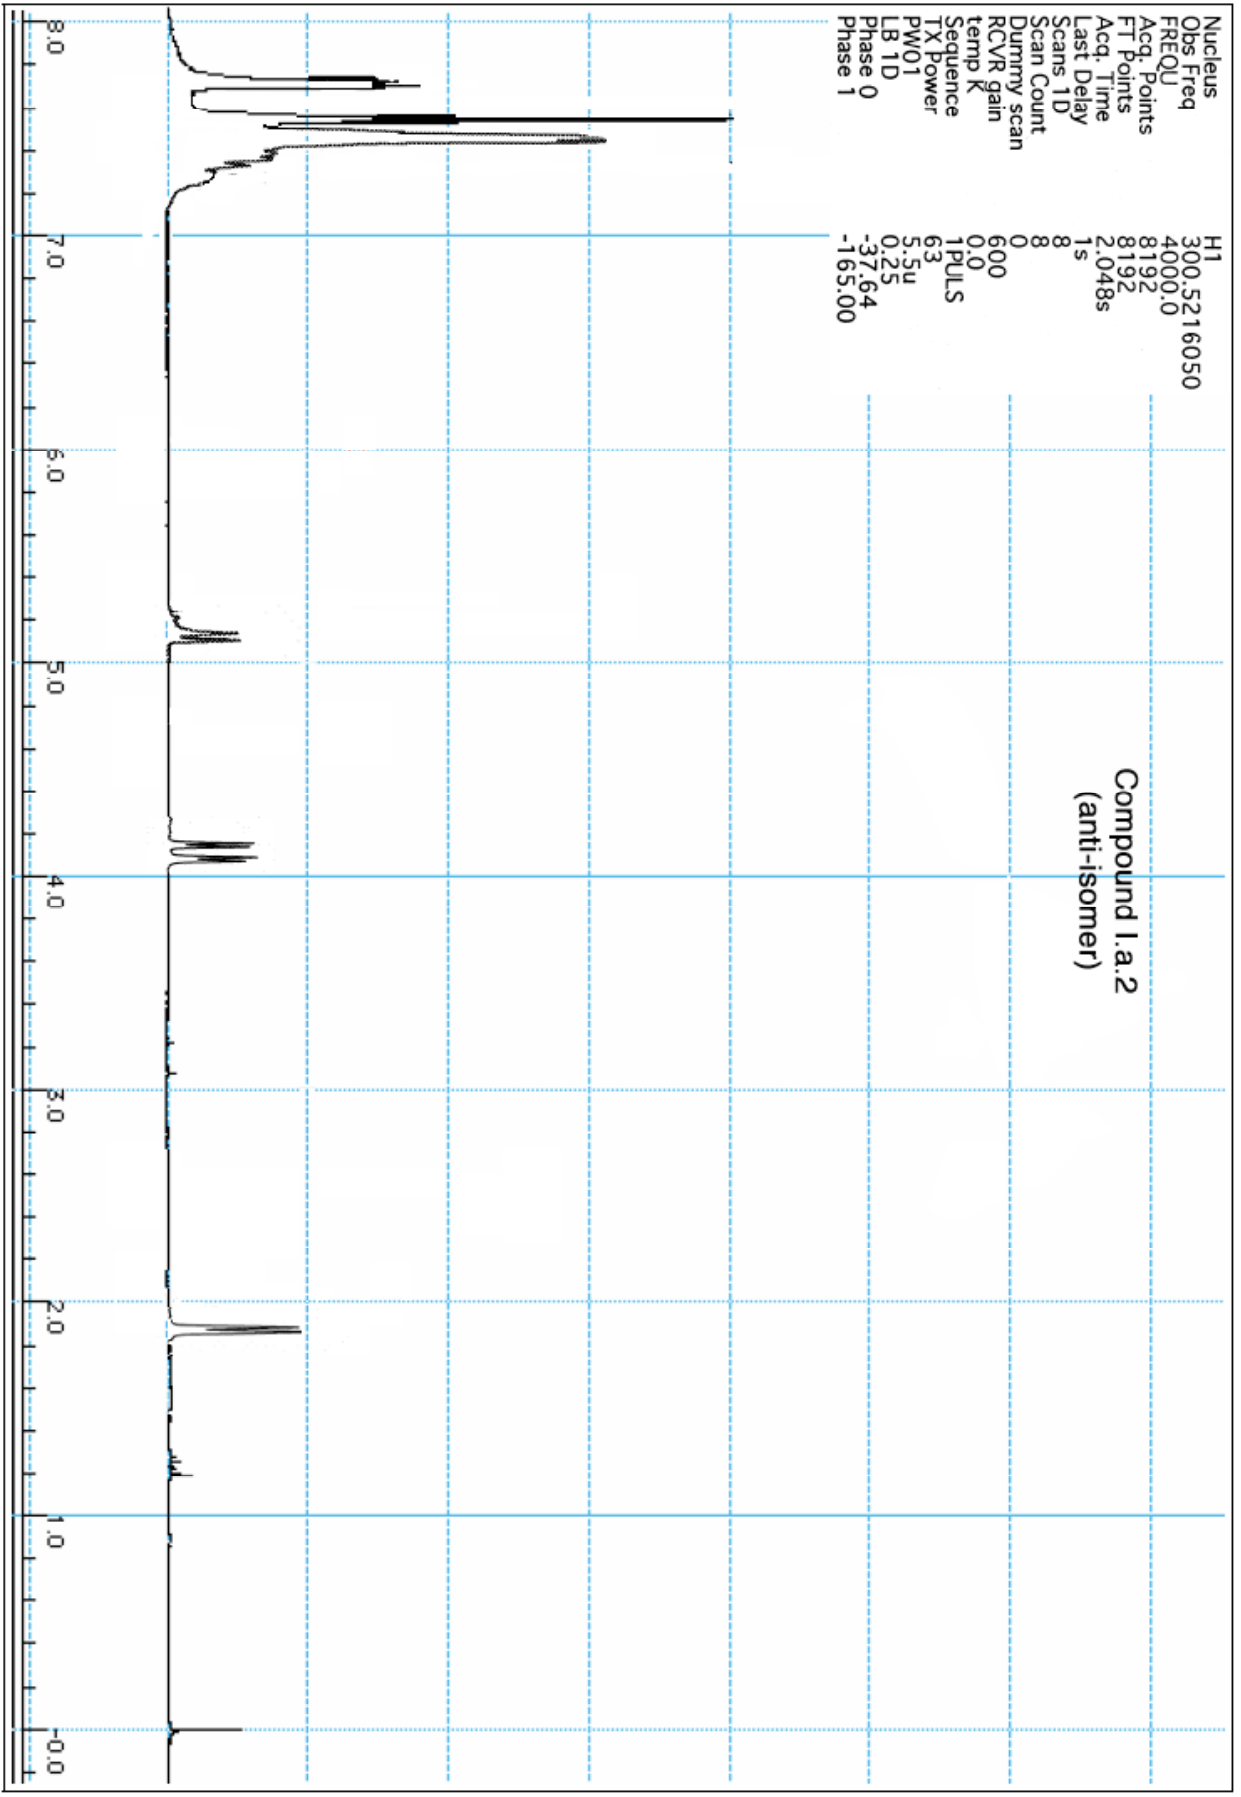



Compound 1.a.2  
(anti-isomer)

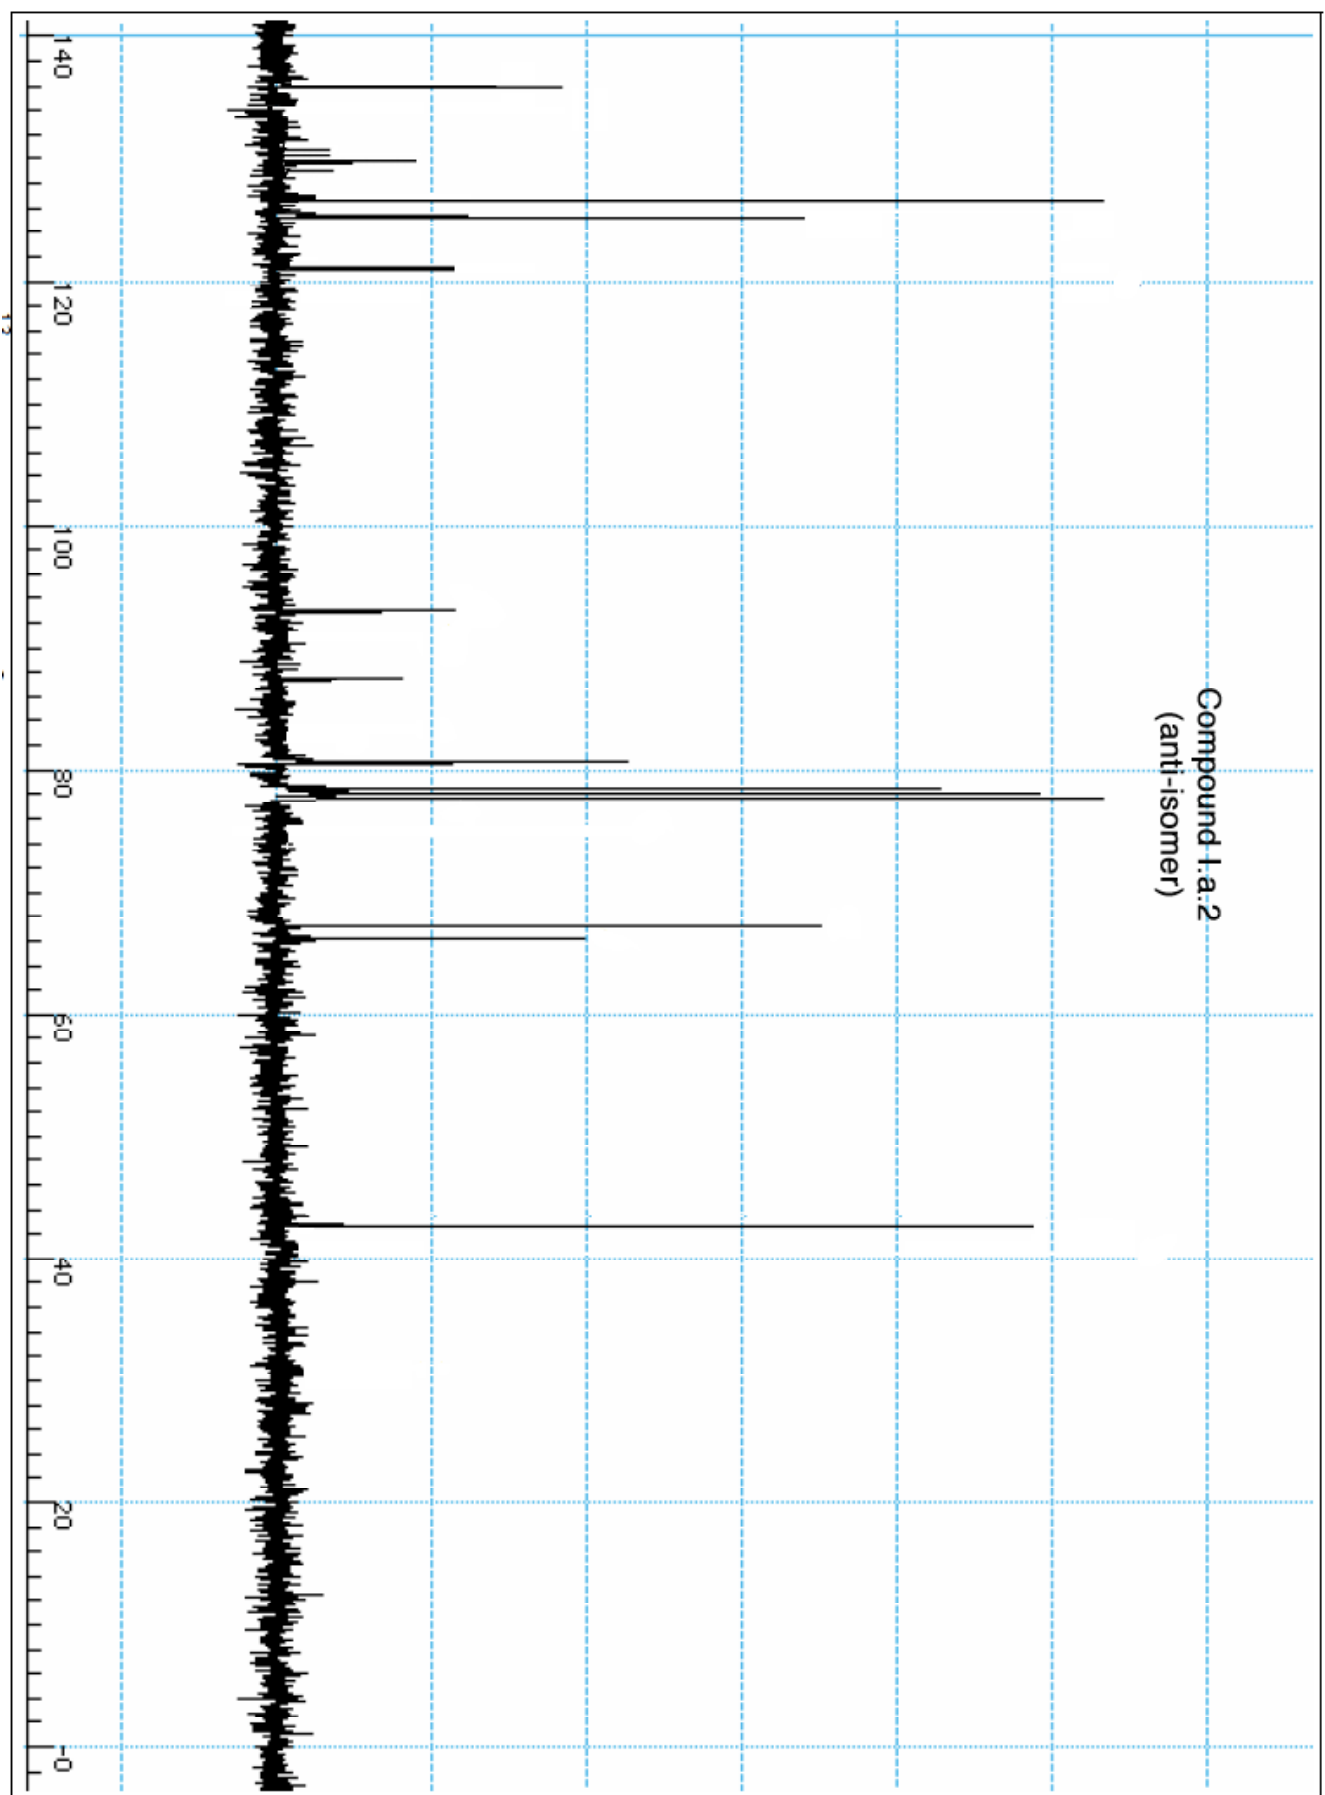

Nucleus H1  
Obs Freq 300.5216050  
FREQU 4000.0  
Acq. Points 8192  
FT Points 8192  
Acq. Time 2.048s  
Last Delay 1s  
Scans 1D 8  
Scan Count 8  
Dummy scan 0  
RCVR gain 600  
temp K 0.0  
Sequence 1PULS  
TX Power 63  
PW01 5.5u  
LB 1D 0.25  
Phase 0 -37.64  
Phase 1 -165.00

Compound 1.a.3  
(syn-isomer)

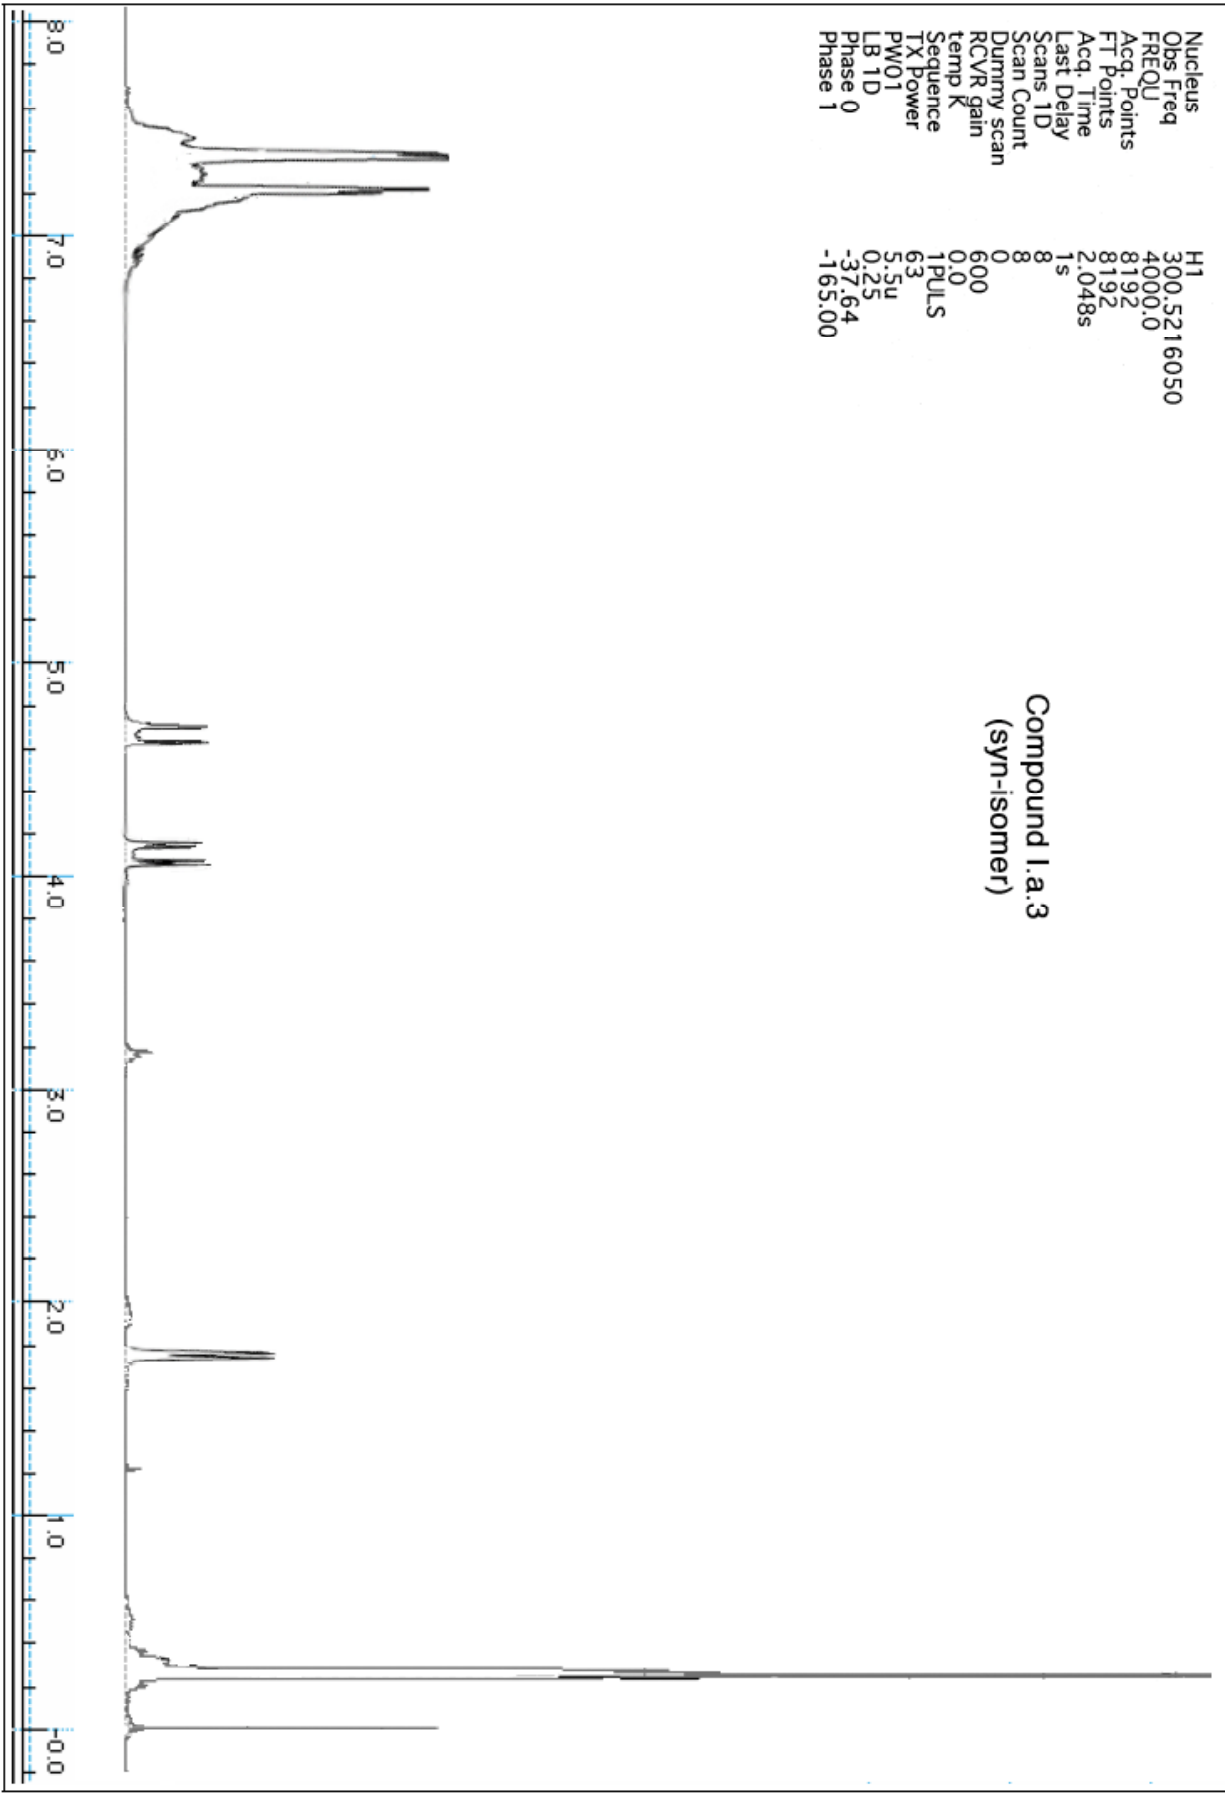

Nucleus C13  
Obs Freq 75.5736988  
FREQU 20000.0  
Acq. Points 16384  
FT Points 16384  
Acq. Time 819.2m  
Last Delay 300m  
Scans 1D 100000  
Scan Count 100000  
Dummy scan 0  
RCVR gain 8000  
temp K 0.0  
Sequence 1PULSE with Dec  
TX Power 60  
PW01  
LB 1D 0.25  
Phase 0 -10.27  
Phase 1 185.00

Compound 1.a.3  
(syn-isomer)

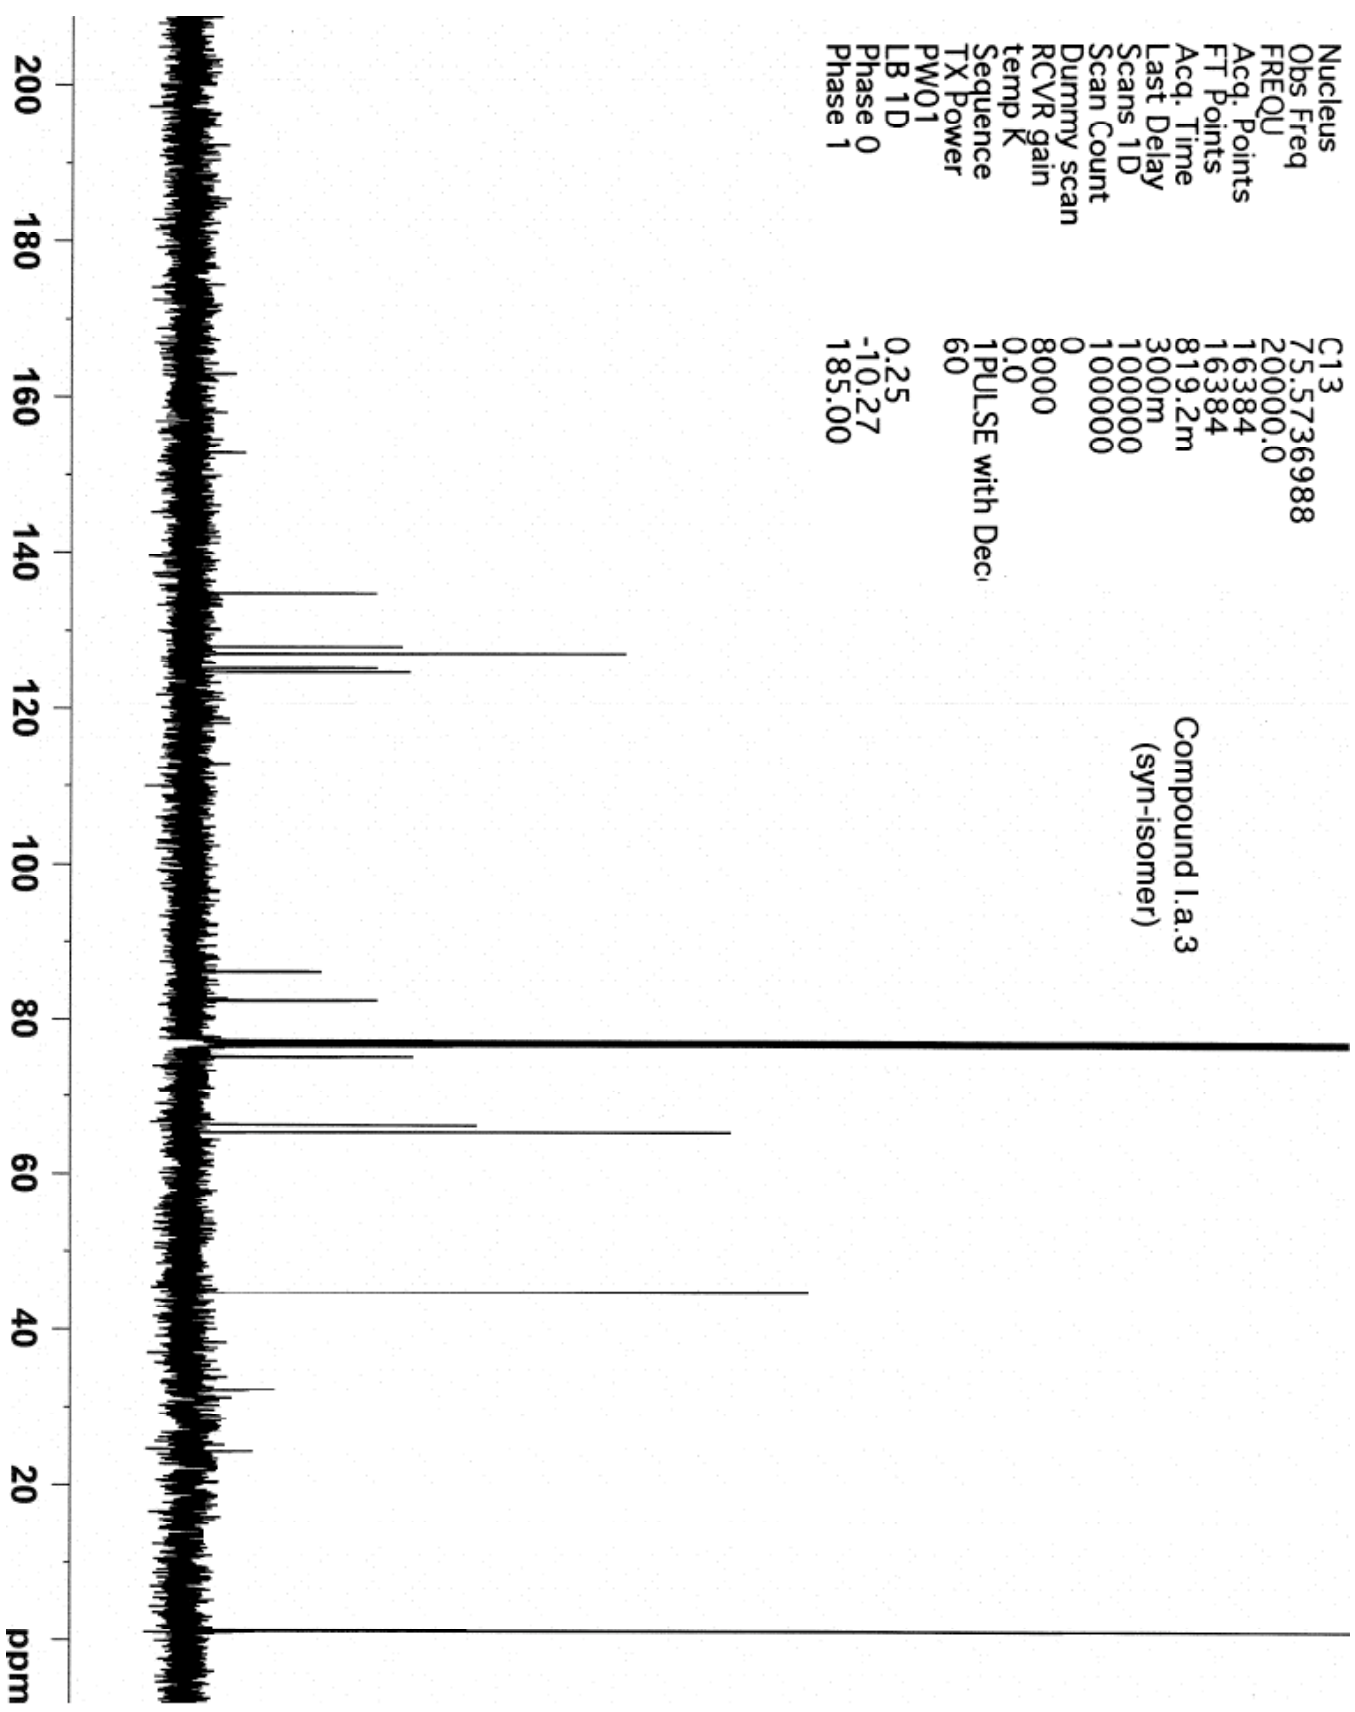

Nucleus H1  
Obs Freq 300.5216050  
FREQJ 4000.0  
Acq. Points 8192  
FT Points 8192  
Acq. Time 2.048s  
Last Delay 1s  
Scans 1D 8  
Scan Count 8  
Dummy scan 0  
RCVR gain 600  
temp K 0.0  
Sequence 1PULS  
TX Power 63  
PW01 5.5u  
LB 1D 0.25  
Phase 0 -37.64  
Phase 1 -165.00

Compound 1.a.3  
(anti-isomer)

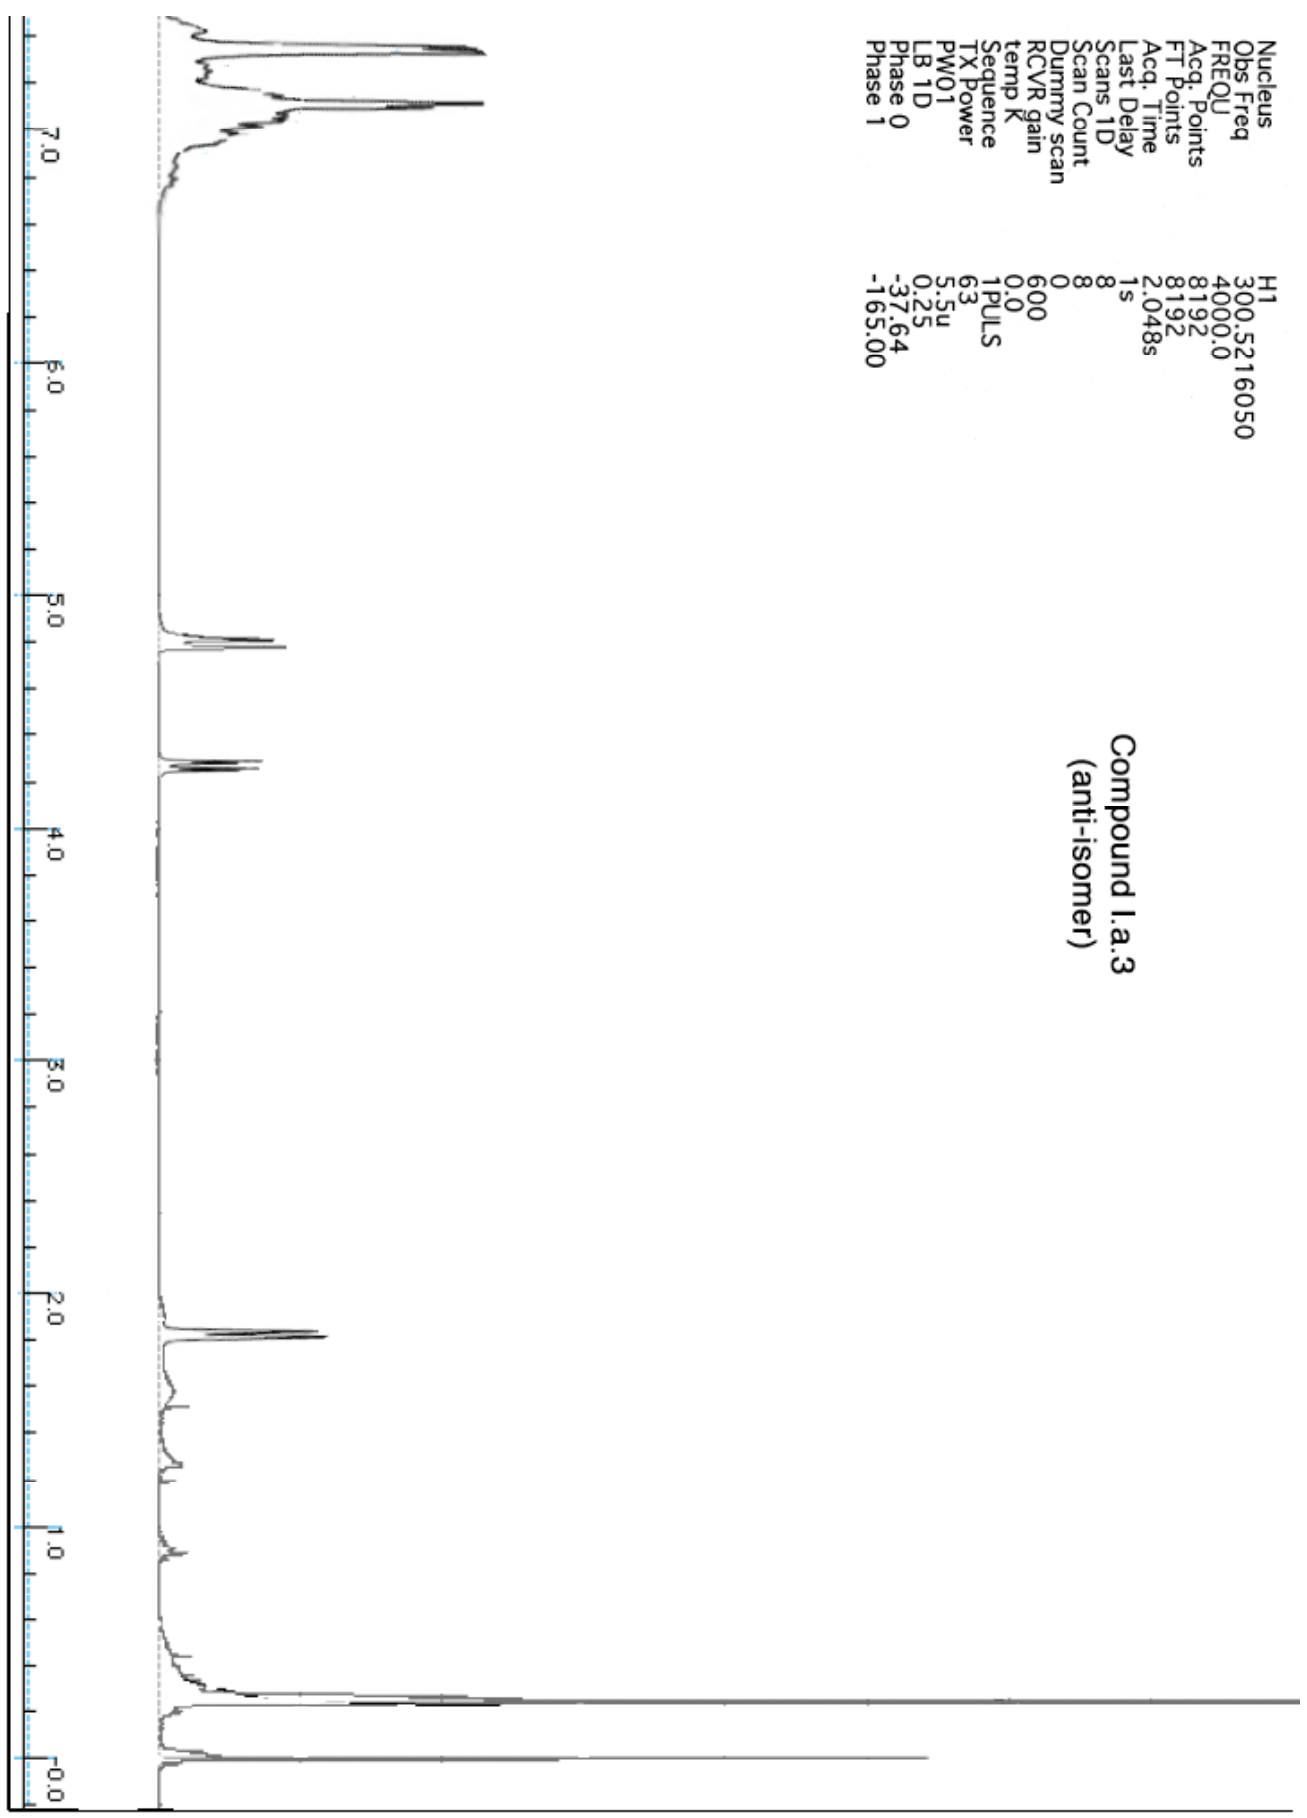

Nucleus C13  
Obs Freq 75.5736988  
FREQU 20000.0  
Acq. Points 16384  
FT Points 16384  
Acq. Time 819.2m  
Last Delay 300m  
Scans 1D 100000  
Scan Count 100000  
Dummy scan 0  
RCVR gain 8000  
temp K 0.0  
Sequence 1PULSE with Decouf  
TX Power 60  
PW01  
LB 1D  
Phase 0  
Phase 1

0.25  
-10.27  
185.00

Compound 1.a.3  
(anti-isomer)

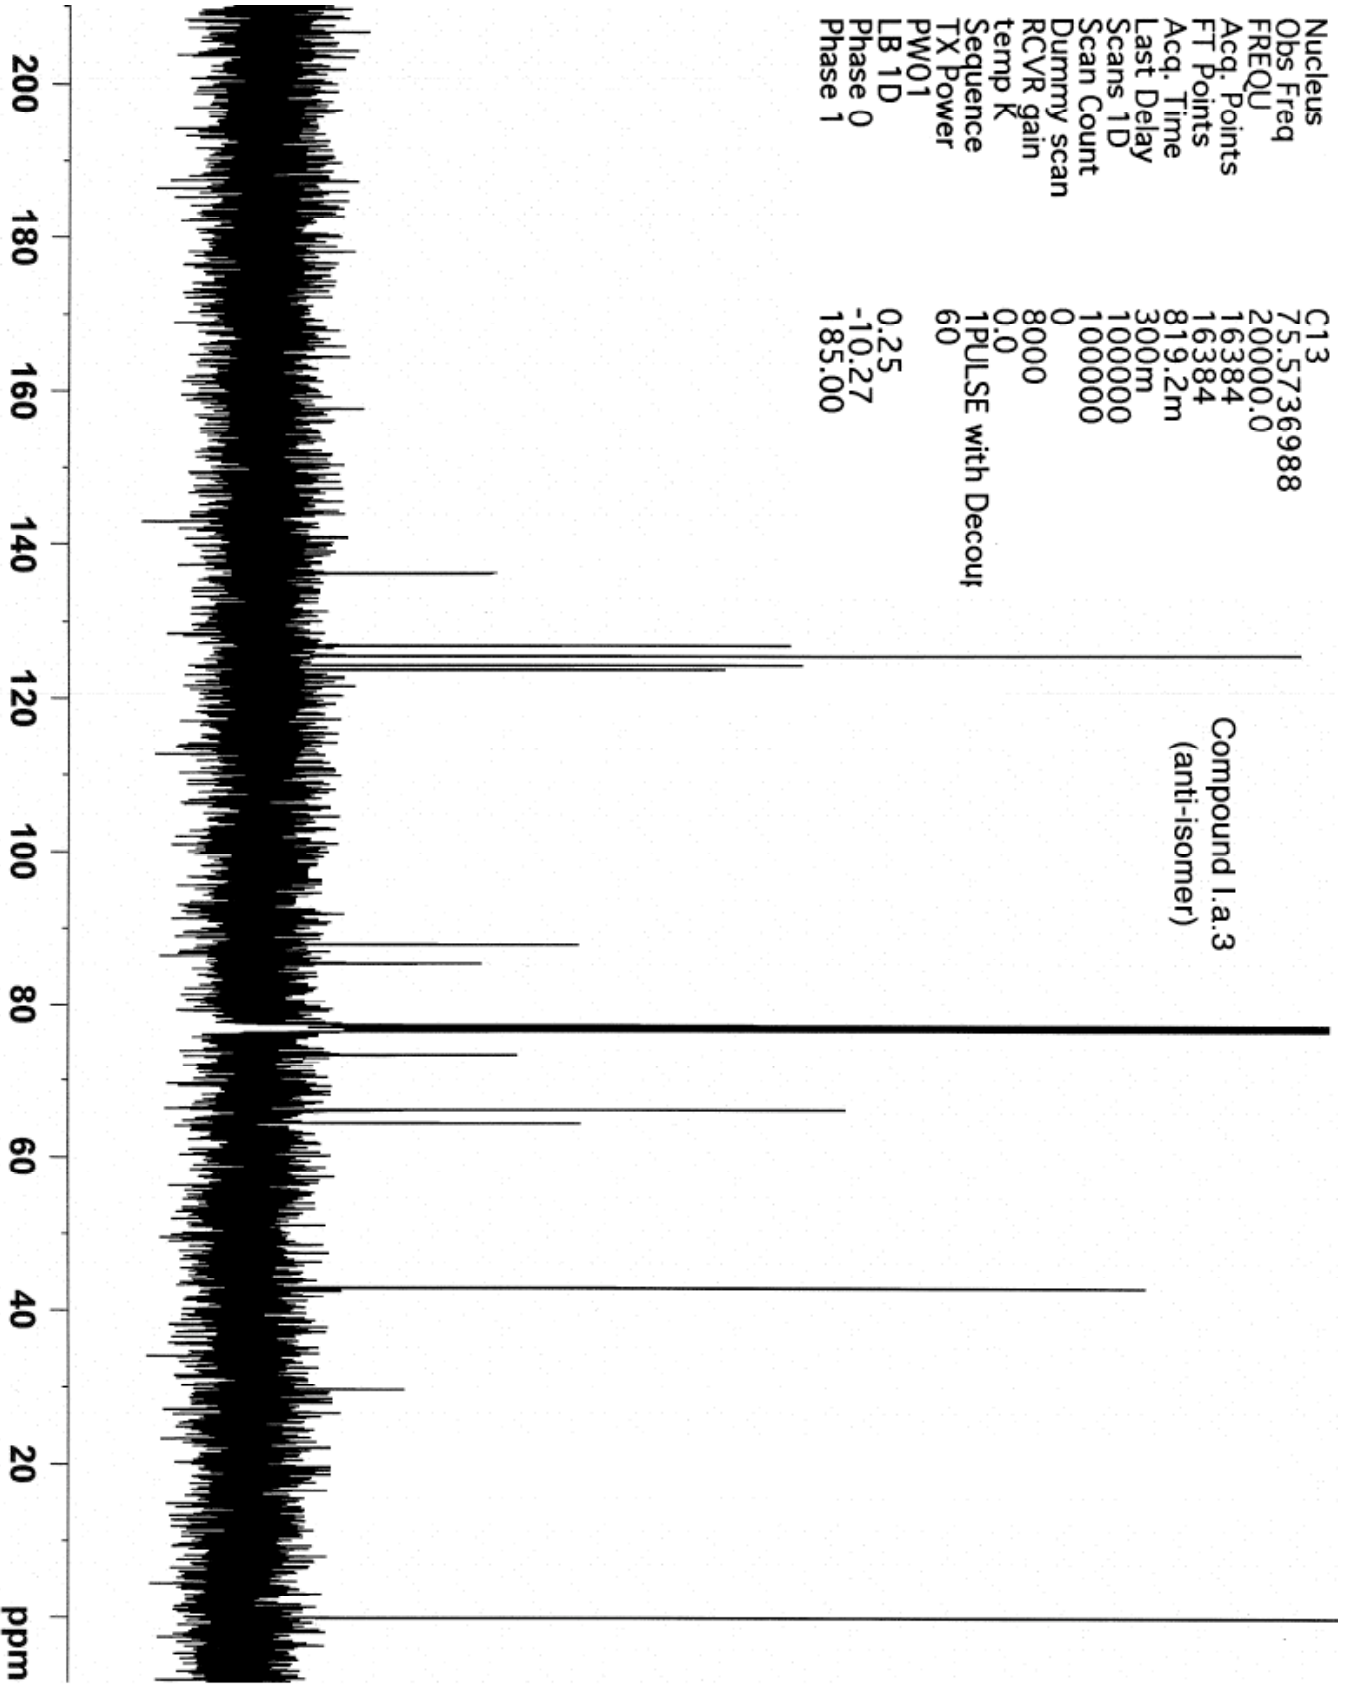

|             |             |
|-------------|-------------|
| Nucleus     | H1          |
| Obs.Freq    | 300.5216050 |
| FREQU       | 4000.0      |
| Acq. Points | 8192        |
| FT Points   | 8192        |
| Acq. Time   | 2.048s      |
| Last Delay  | 1s          |
| Scans 1D    | 24          |
| Scan Count  | 24          |
| Dummy scan  | 0           |
| RCVR gain   | 480         |
| temp K      | 0.0         |
| Sequence    | 1PULS       |
| TX Power    | 63          |
| PW01        | 5.5u        |
| LB 1D       | 0.25        |
| Phase 0     | -55.79      |
| Phase 1     | -170.00     |

Compound I.a.4  
(mixture)

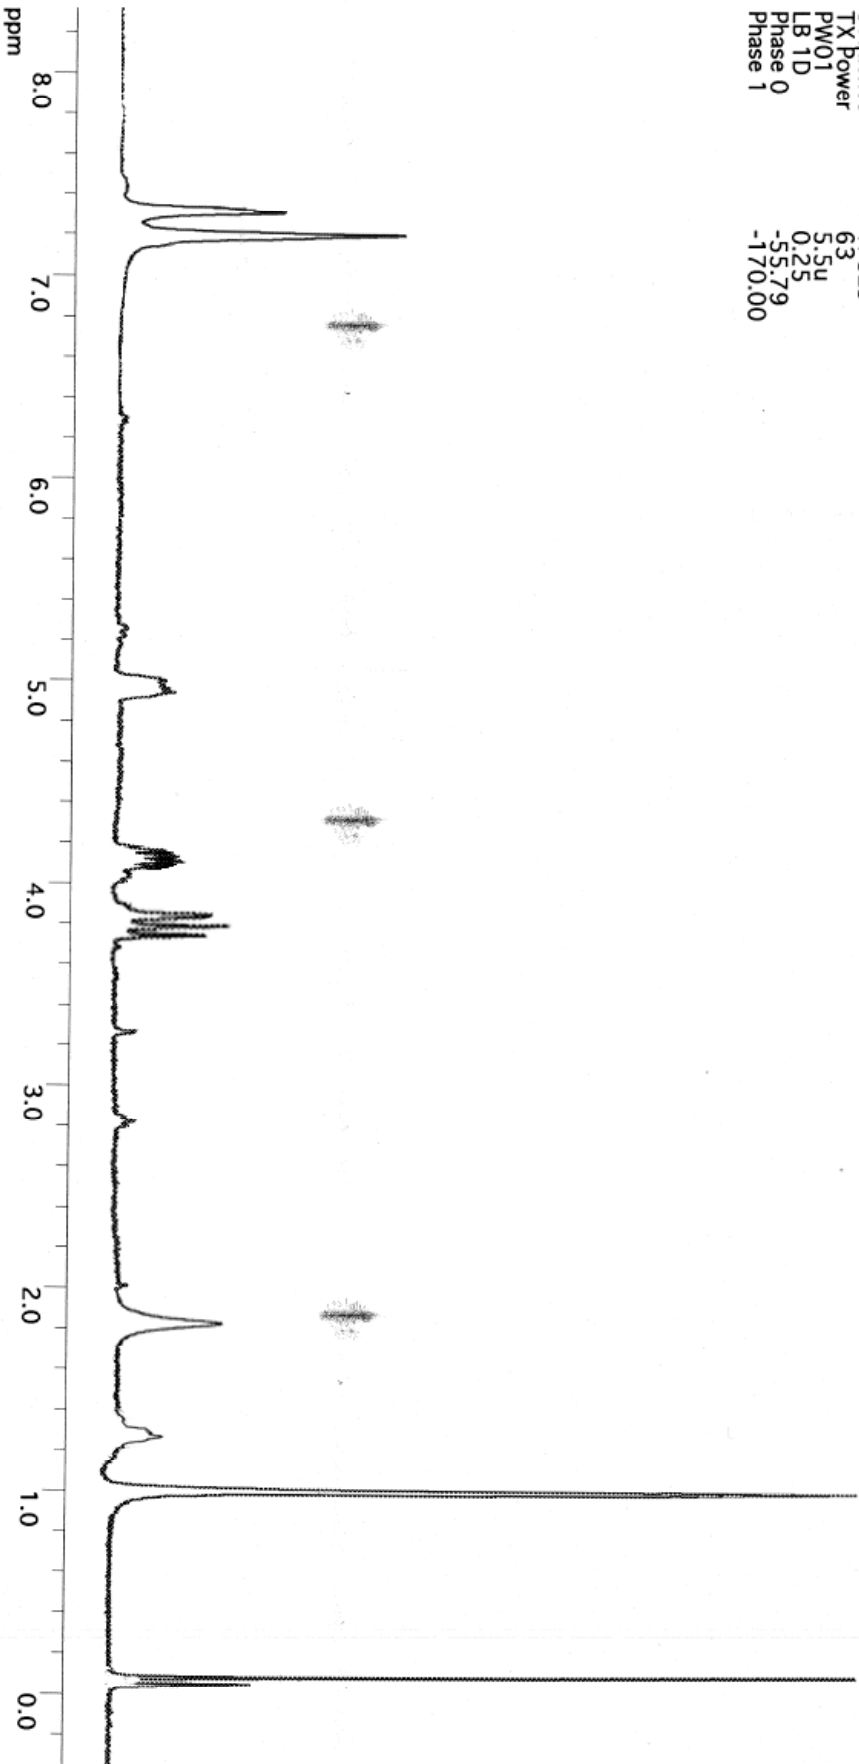

Compound 1.a.4

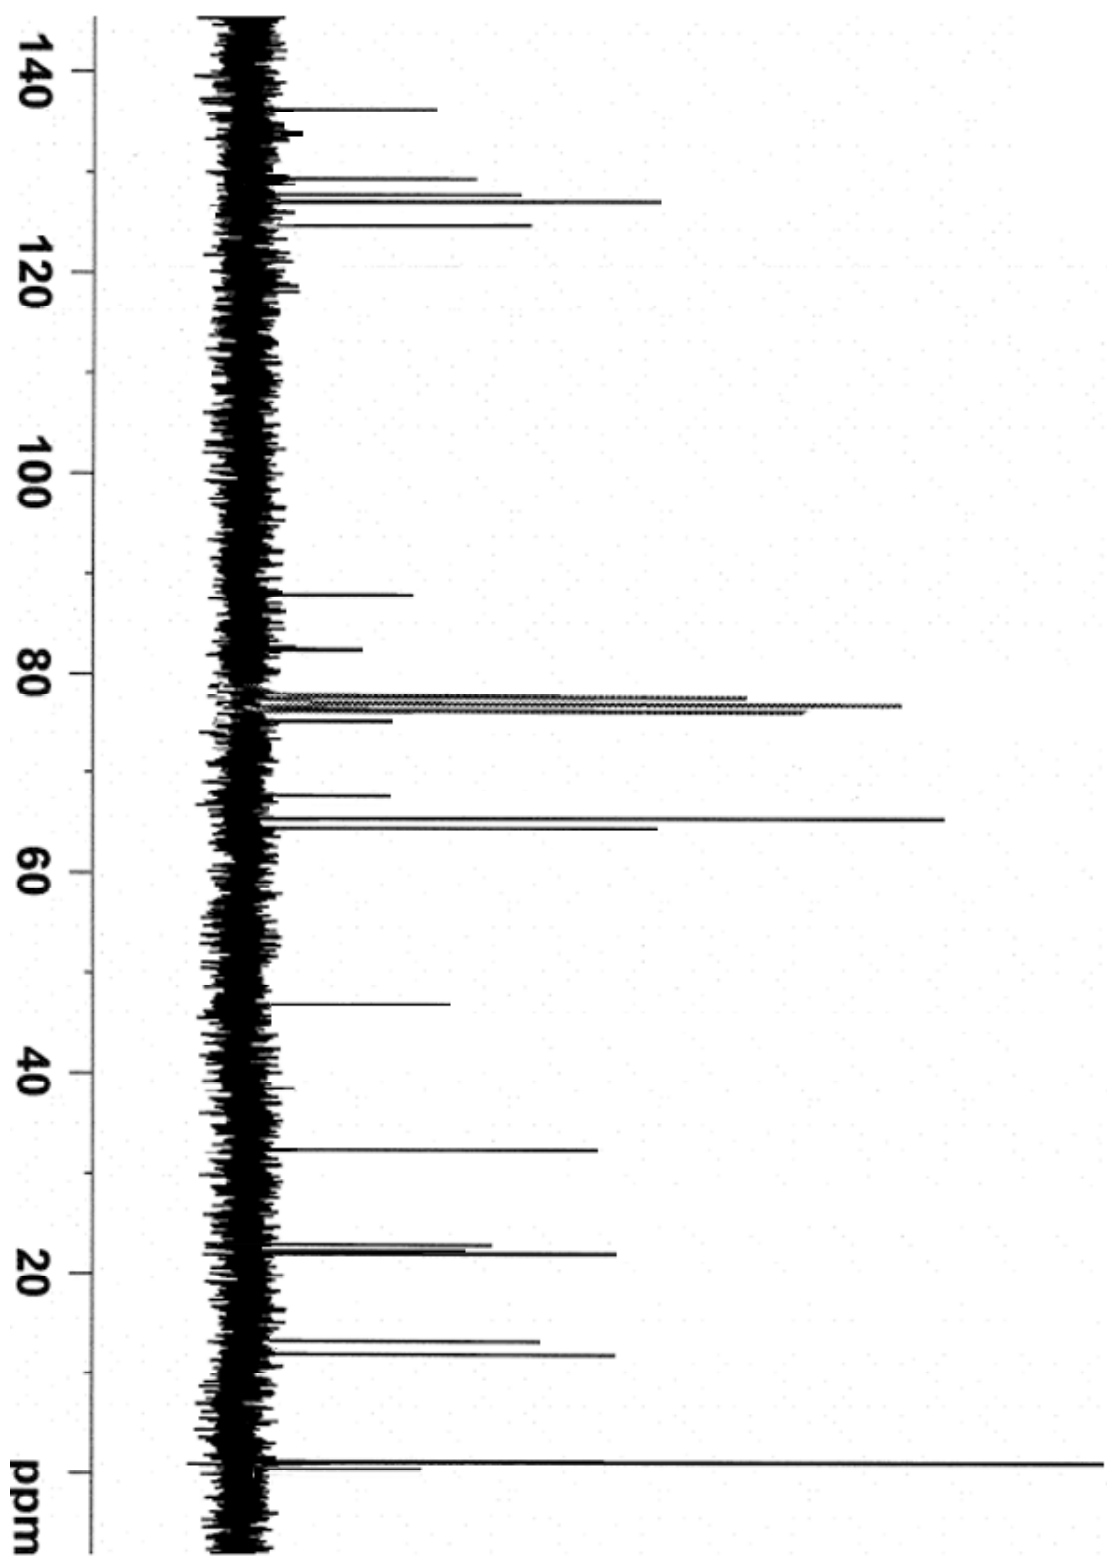

Nucleus H1  
Obs Freq 300.5216050  
FREQU 4000.0  
Acq. Points 8192  
FT Points 8192  
Acq. Time 2.048s  
Last Delay 1s  
Scans 1D 16  
Scan Count 0  
Dummy scan 80  
RCVR gain 0.0  
TX Power 1PULS  
Sequence 63  
PW01 5.5u  
LB 1D 0.25  
Phase 0 -47.49  
Phase 1 -149.00

Compound II.a.1

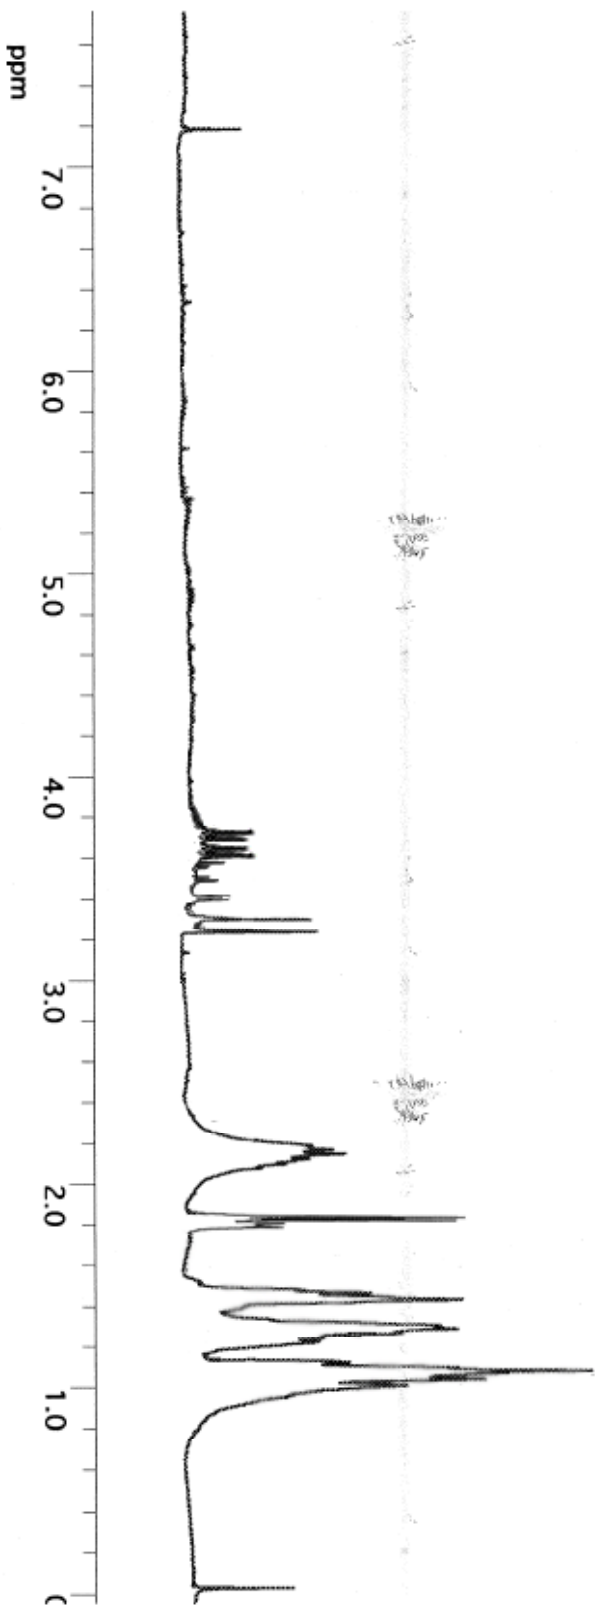



Nucleus C13  
Dwell 1D 50u  
SW +/- 10000.0  
FILTER 10000  
Scans 1D 1000  
Scan Count 500  
Points 1D 8192  
Last Delay 200m  
Obs Freq 75.5736988  
F1 base 75.5736988  
F1 offset 0.0000 KHz  
RCVR gain 9999  
F2 freq 300.5210900  
F2 base 300.1036340  
F2 offset 417.4560 KHz  
DEC Power 70  
DEC Scheme WALTZ 16  
Dummy scan 0

Compound II.a.1

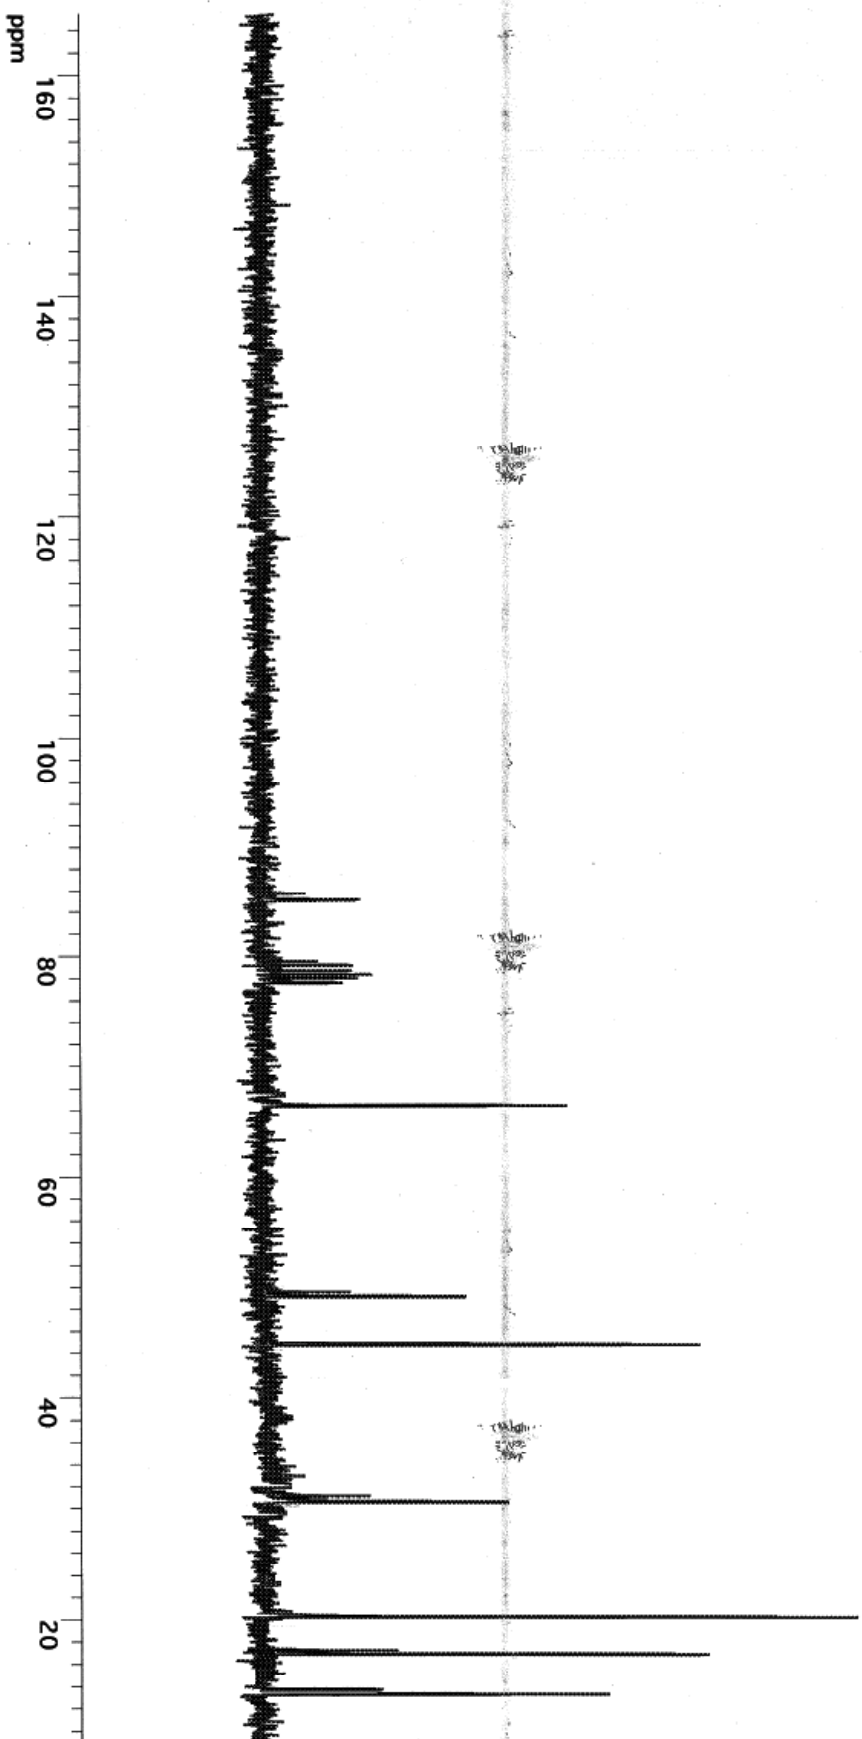

Nucleus H1  
Obs Freq 300.5216050  
FREQU 4000.0  
Acq. Points 8192  
FT Points 8192  
Acq. Time 2.048s  
Last Delay 1s  
Scans 1D 8  
Scan Count 8  
Dummy scan 0  
RCVR gain 600  
temp K 0.0  
Sequence 1PULS  
TX Power 63  
PW01 5.5u  
LB 1D 0.25  
Phase 0 -37.64  
Phase 1 -165.00

Compound II.a.2  
(syn-isomer)

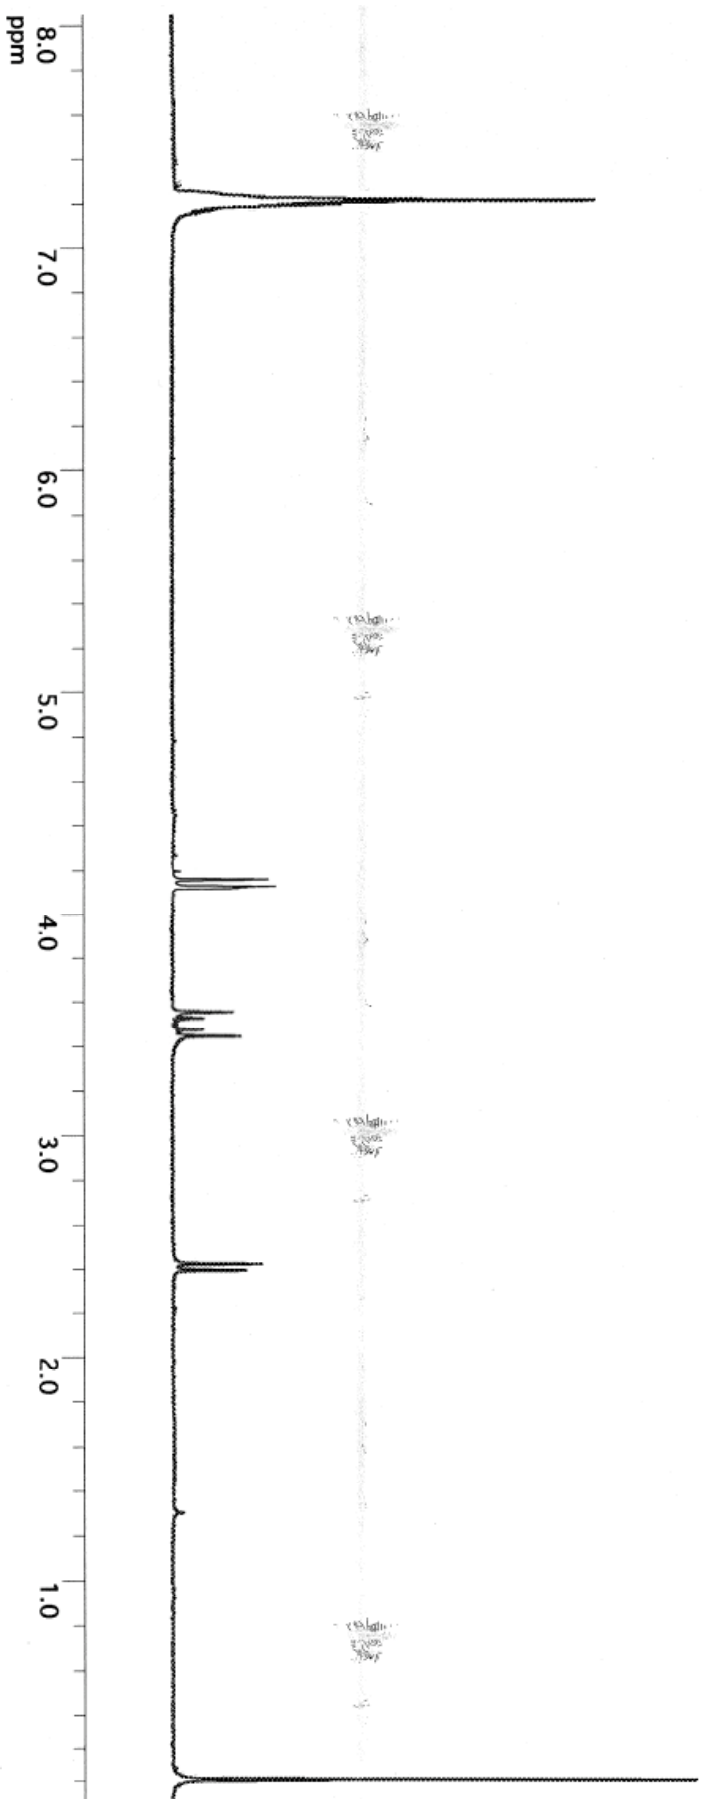

Compound II.a.2  
(syn-isomer)

|             |                     |
|-------------|---------------------|
| Nucleus     | C13                 |
| Obs Freq    | 75.5736988          |
| FREQ        | 20000.0             |
| Acq. Points | 8192                |
| FT Points   | 8192                |
| Acq. Time   | 409.6m              |
| Last Delay  | 200m                |
| Scans 1D    | 5000                |
| Scan Count  | 5000                |
| Dumpry scan | 0                   |
| RCVR gain   | 8000                |
| temp K      | 0.0                 |
| Sequence    | 1PULSE with Decoupl |
| TX Power    | 60                  |
| PW01        | 0.25                |
| LB 1D       | -60.53              |
| Phase 0     | 92.00               |
| Phase 1     |                     |

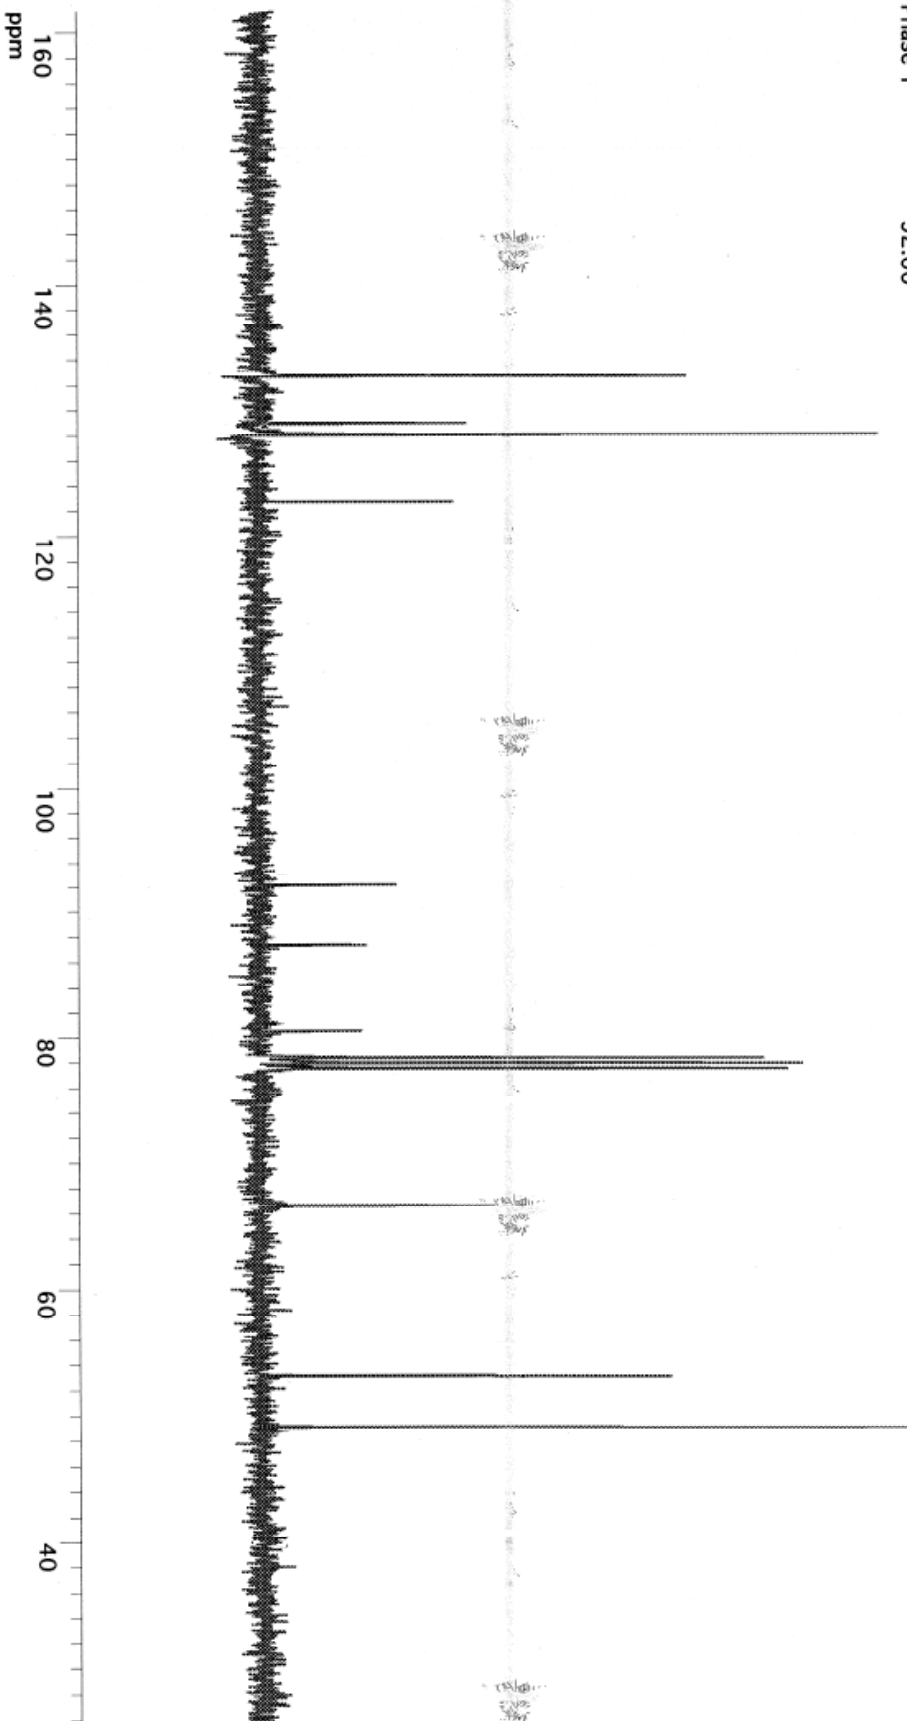

Nucleus H1  
Obs Freq 300.5216050  
FREQU 4000.0  
Acq. Points 8192  
FT Points 8192  
Acq. Time 2.048s  
Last Delay 1s  
Scans 1D 16  
Scan Count 16  
Dummy scan 0  
RCVR gain 200  
temp K 0.0  
TX Power 63  
PW01 5.5u  
LB 1D 0.25  
Phase 0 -59.83  
Phase 1 -163.00

Compound II.a.2  
(anti-isomer)

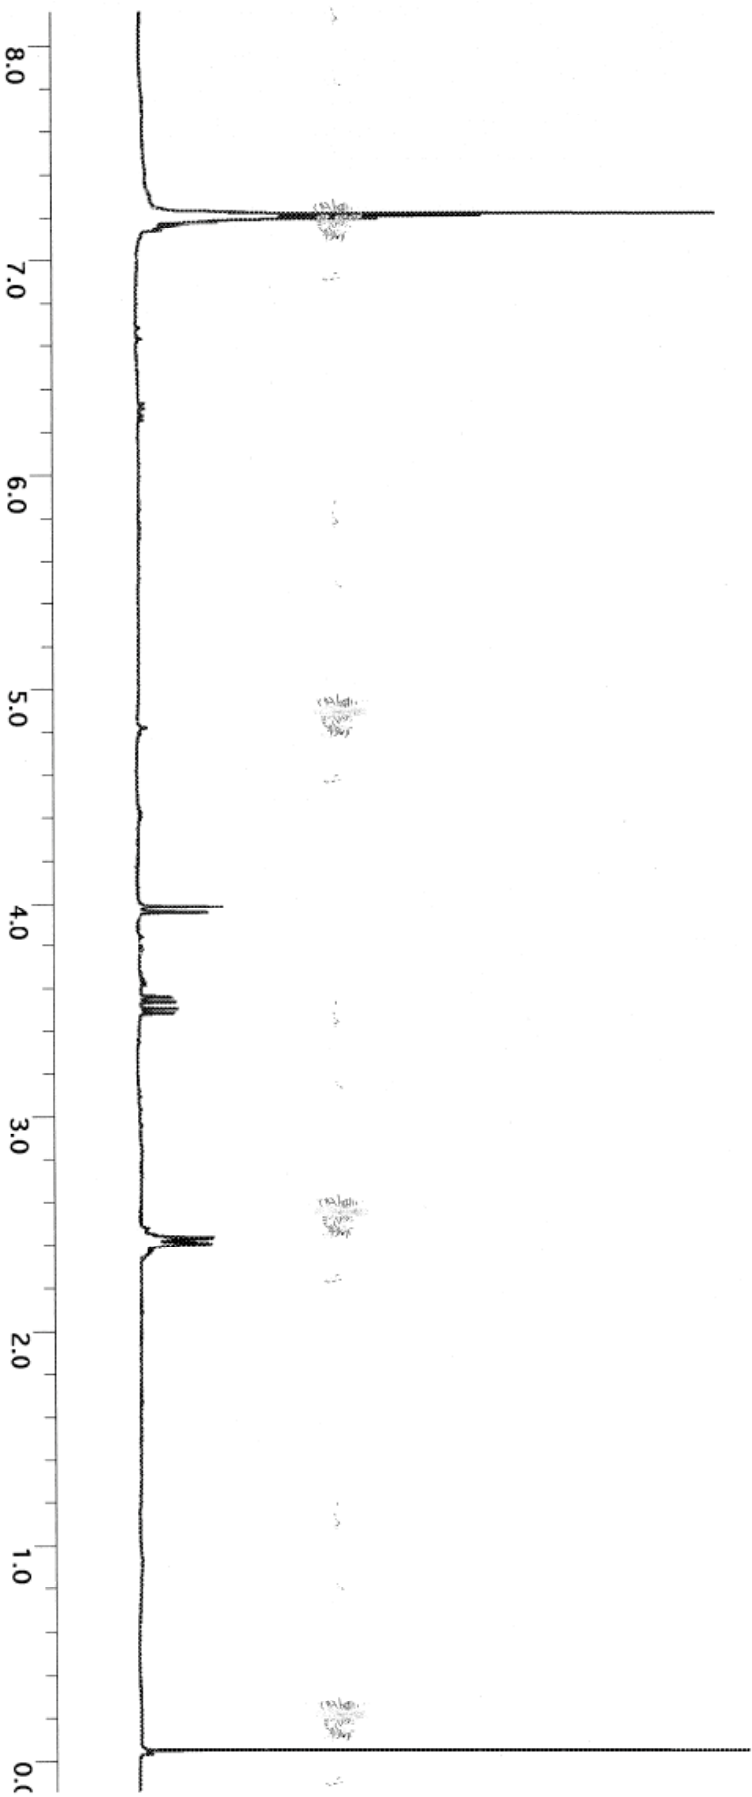

|             |            |
|-------------|------------|
| Nucleus     | C13        |
| Obs Freq    | 75.5736988 |
| FREQ        | 20000.0    |
| Acq. Points | 8192       |
| FT Points   | 8192       |
| Acq. Time   | 409.6m     |
| Last Delay  | 200m       |
| Scans 1D    | 30000      |
| Scan Count  | 30000      |
| Dummy scan  | 0          |
| RCVR gain   | 9999       |
| temp K      | 0.0        |
| TX Power    | 60         |
| PW01        | 0.25       |
| LB 1D       | -56.75     |
| Phase 0     | 86.00      |
| Phase 1     |            |

Compound II.a.2  
(anti-isomer)

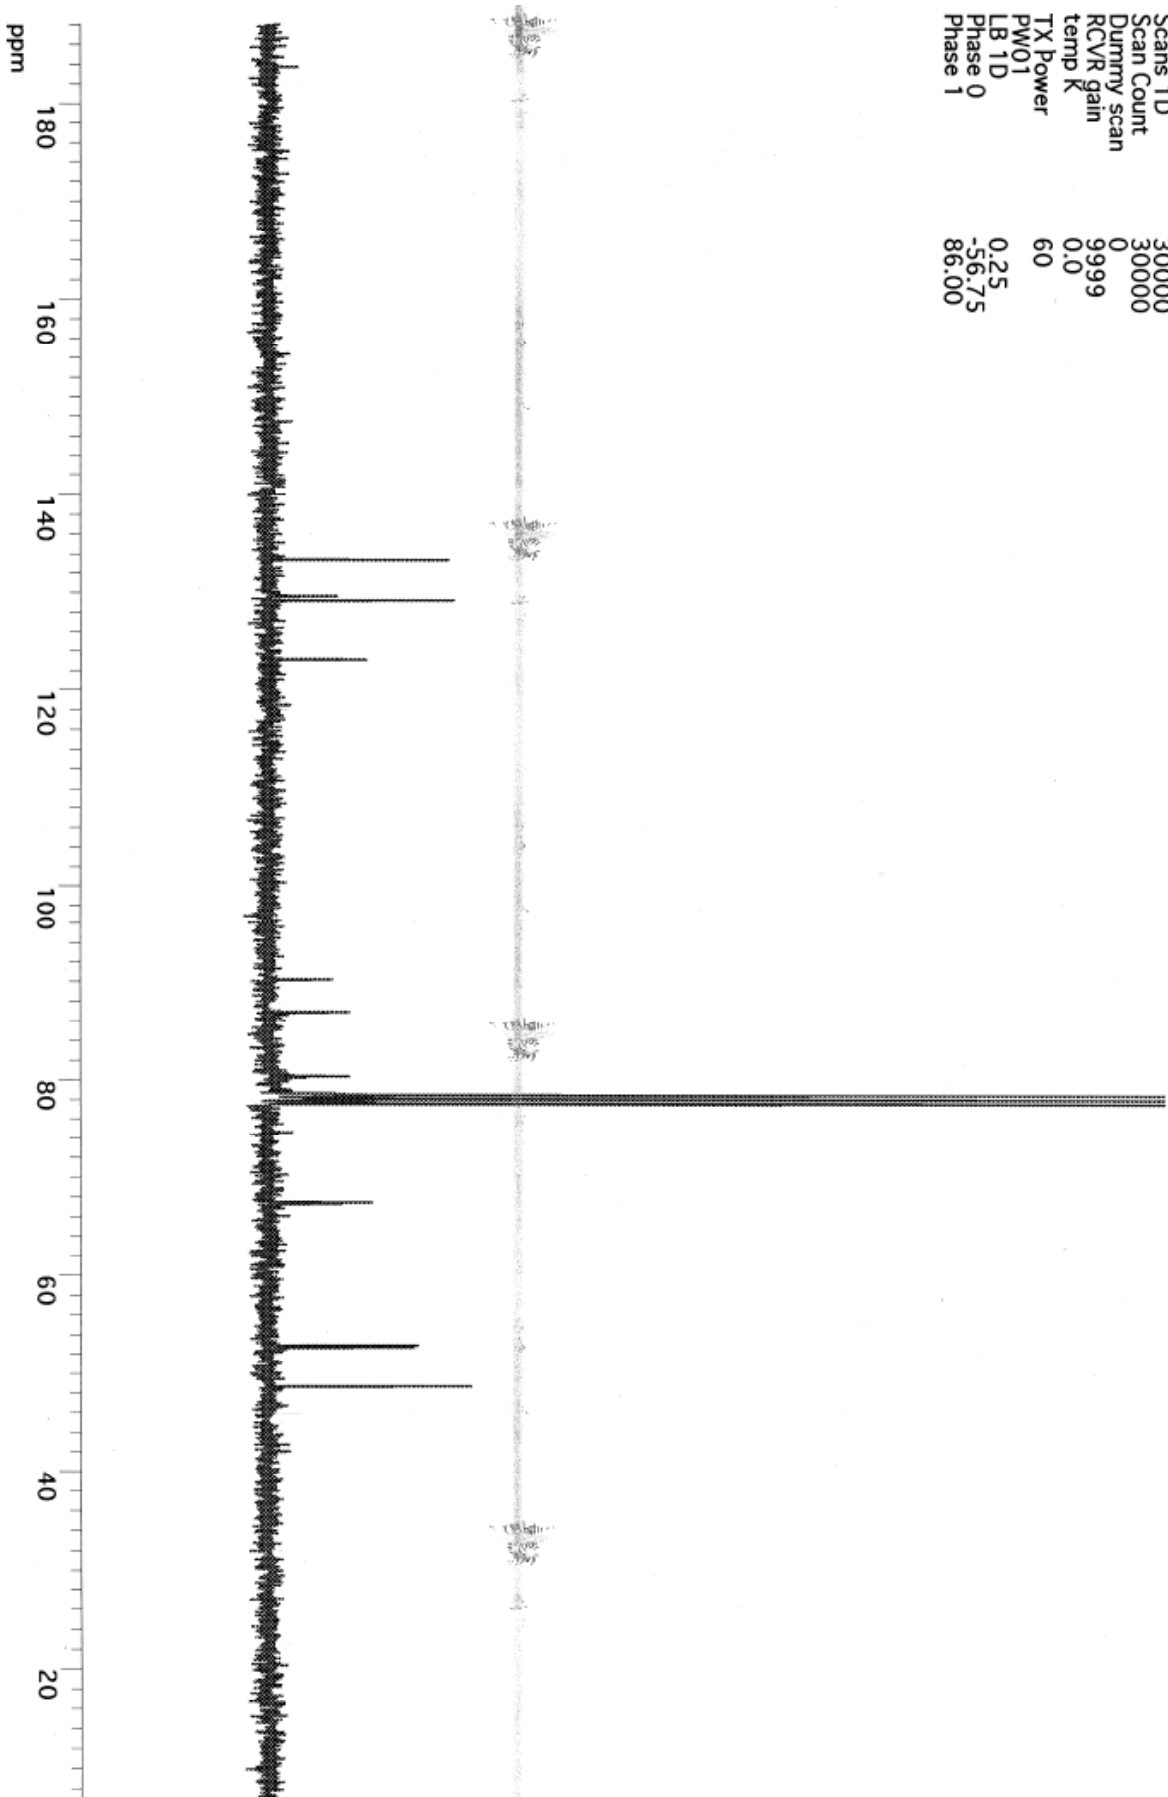

Nucleus H1  
Obs Freq 300.5216050  
FREQ 4000.0  
Acq. Points 8192  
FT Points 8192  
Acq. Time 2.048s  
Last Delay 1s  
Scans 1D 8  
Scan Count 8  
Dummy scan 0  
RCVR gain 10  
temp K 0.0  
Sequence 1PULS  
TX Power 63  
PW01 5.5u  
LB 1D 0.25  
Phase 0 -46.05  
Phase 1 -155.00

Compound II.a.3  
(syn-isomer)

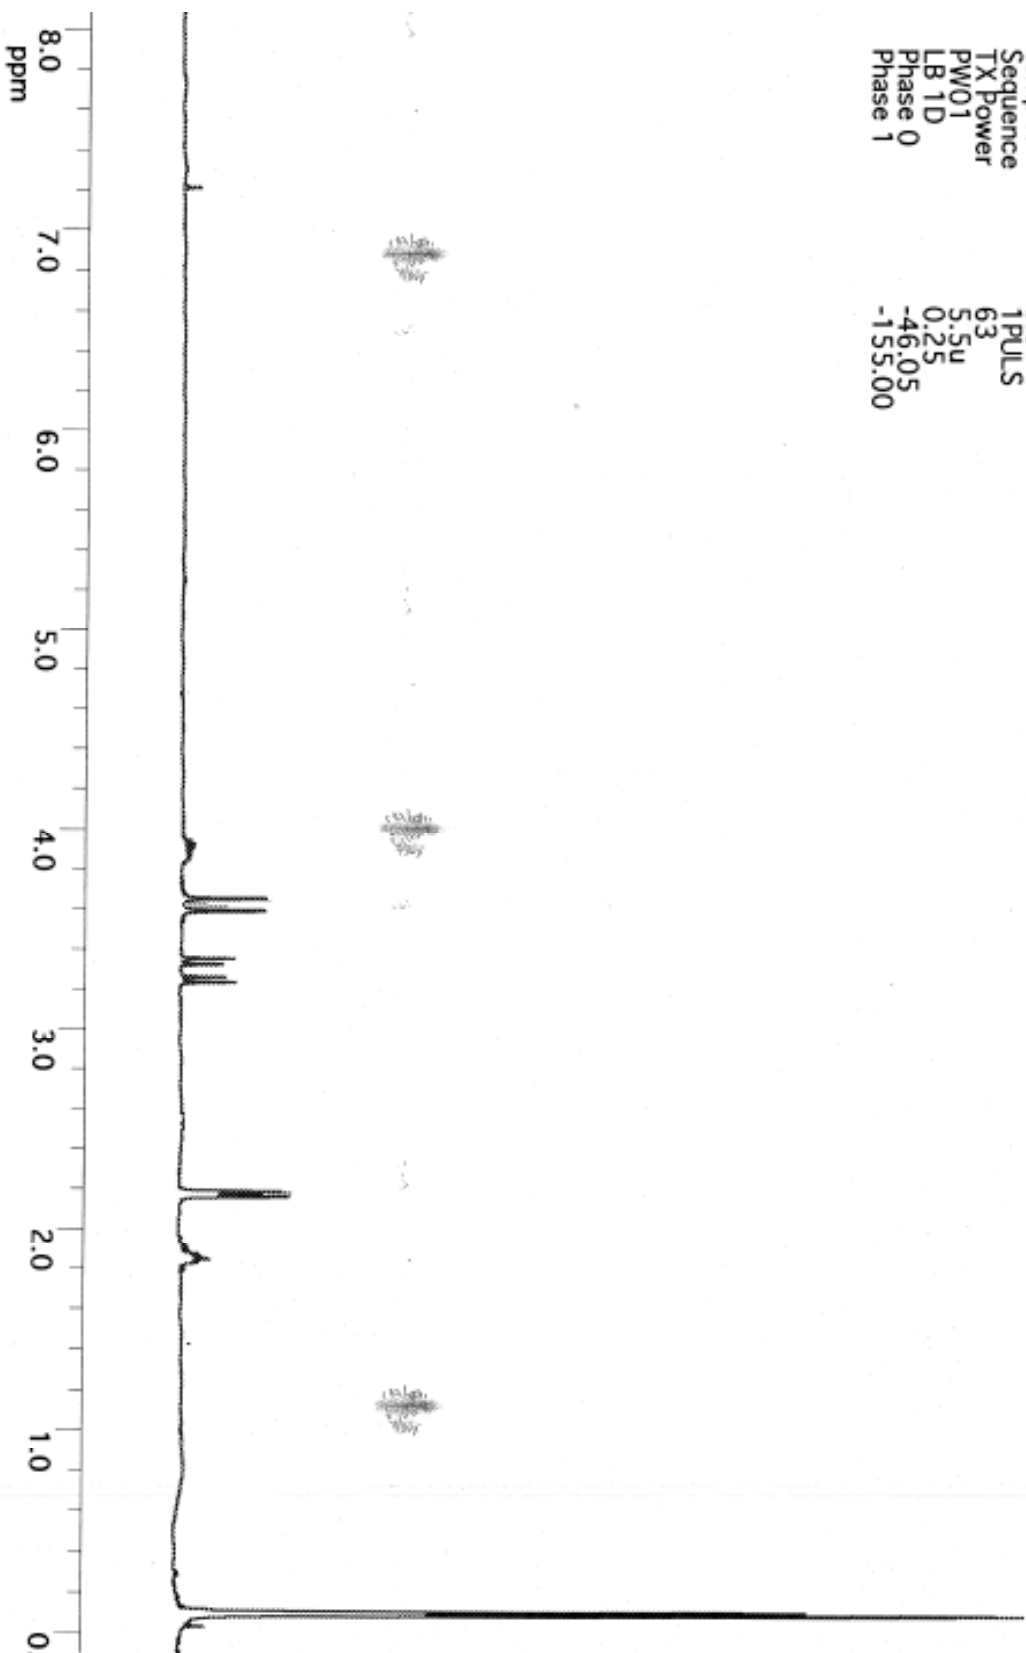

|             |                    |
|-------------|--------------------|
| Nucleus     | C13                |
| Obs Freq    | 75.5736988         |
| FREQU       | 20000.0            |
| Acq. Points | 8192               |
| FT Points   | 8192               |
| Acq. Time   | 409.6m             |
| Last Delay  | 200m               |
| Scans 1D    | 5000               |
| Scan Count  | 5000               |
| Dummy scan  | 0                  |
| RCVR gain   | 9999               |
| temp K      | 0.0                |
| Sequence    | 1PULSE with Decouf |
| TX Power    | 60                 |
| PW01        |                    |
| LB 1D       | 0.25               |
| Phase 0     | -63.76             |
| Phase 1     | 137.00             |

Compound II.a.3  
(syn-isomer)

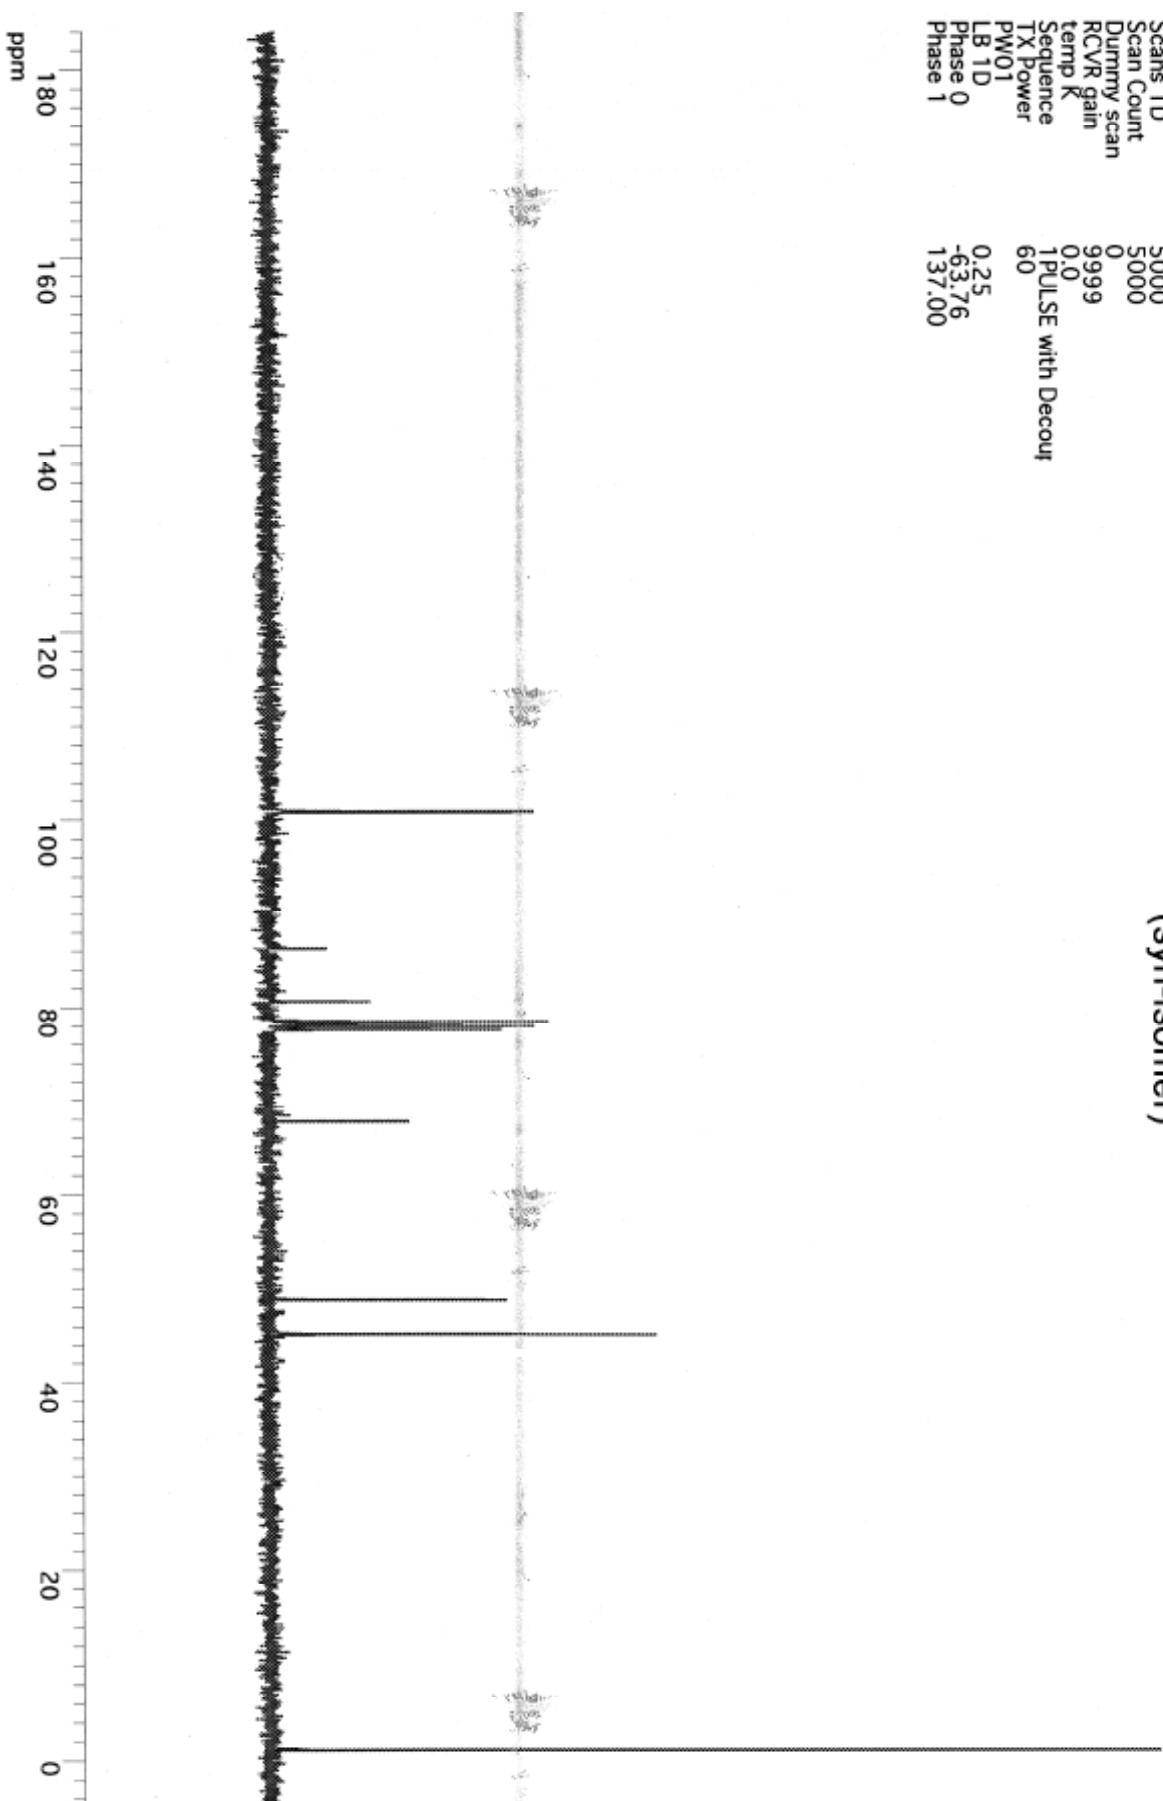

Nucleus H1  
Obs Freq 300.5216050  
FREQU 4000.0  
Acq. Points 8192  
FT Points 8192  
Acq. Time 2.048s  
Last Delay 1s  
Scans 1D 8  
Scan Count 8  
Dummy scan 0  
RCVR gain 0  
temp K 90  
Sequence 0.0  
TX Power 1PULS  
LB 1D 63  
Phase 0 -57.53  
Phase 1 -169.00

Compound II.a.3  
(anti-isomer)

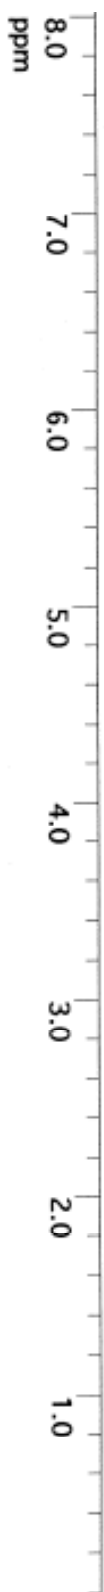



|             |               |
|-------------|---------------|
| Nucleus     | C13           |
| Obs Freq    | 75.5736988    |
| FREQU       | 16000.0       |
| Acq. Points | 8192          |
| FT Points   | 8192          |
| Acq. Time   | 512m          |
| Last Delay  | 200m          |
| Scans 1D    | 5000          |
| Scan Count  | 2000          |
| Dummy scan  | 0             |
| RCVR gain   | 9900          |
| temp K      | 0.0           |
| Sequence    | 1PULSE with f |
| TX Power    | 60            |
| PWM01       |               |
| LB 1D       | 0.25          |
| Phase 0     | -54.52        |
| Phase 1     | 54.00         |

**Compound II.a.3  
(anti-isomer)**

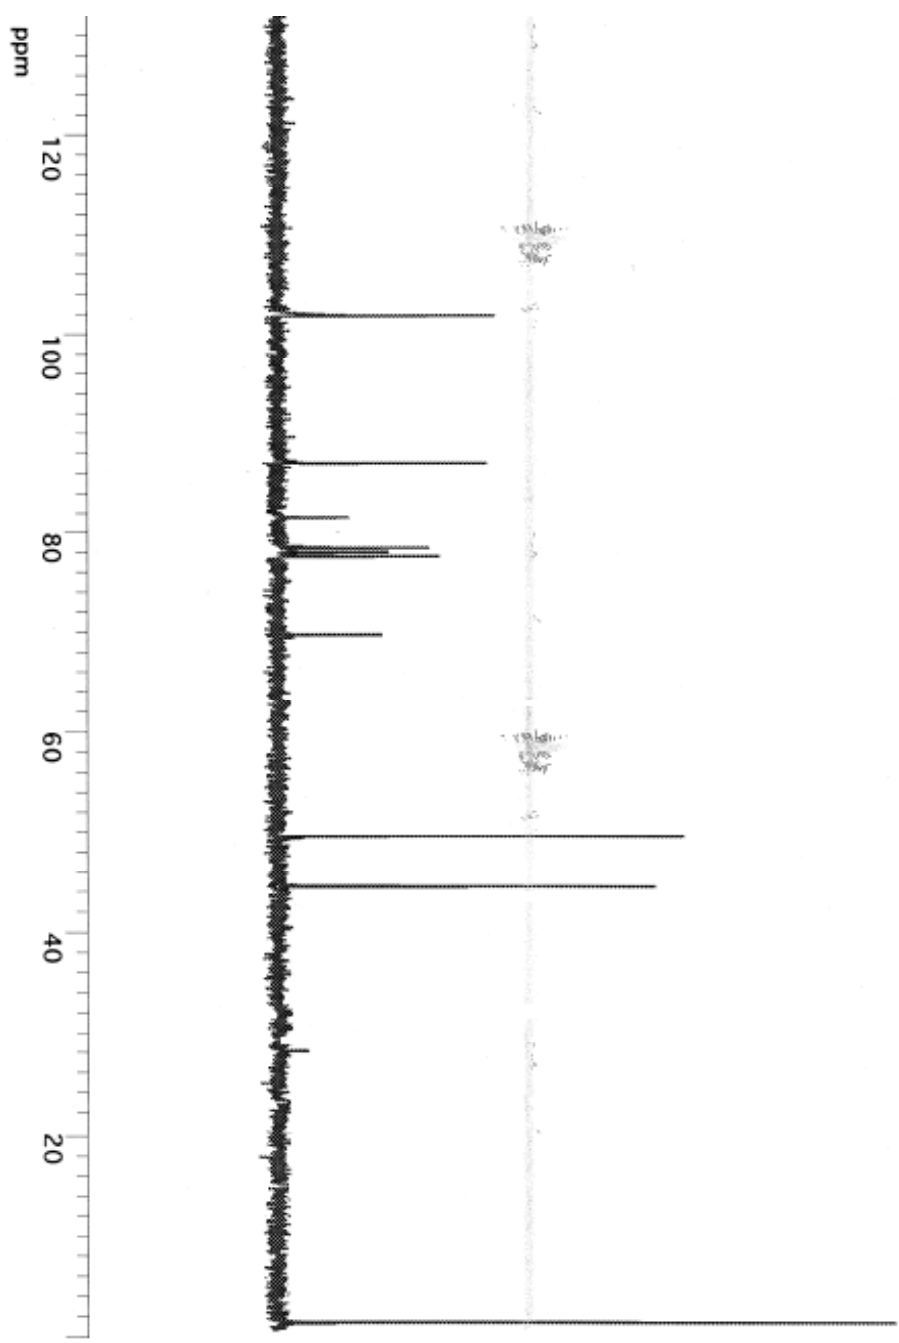

Nucleus H1  
Obs Freq 300.5216050  
FREQU 40000.0  
Acq. Points 8192  
FT Points 8192  
Acq. Time 2.048s  
Last Delay 1s  
Scans 1D 8  
Scan Count 0  
Dummy scan 0  
RCVR gain 30  
temp K 0.0  
Sequence 1PULS  
TX Power 63  
PW01 5.5u  
LB 1D 0.25  
Phase 0 -58.34  
Phase 1 -136.00

Compound II.a.4

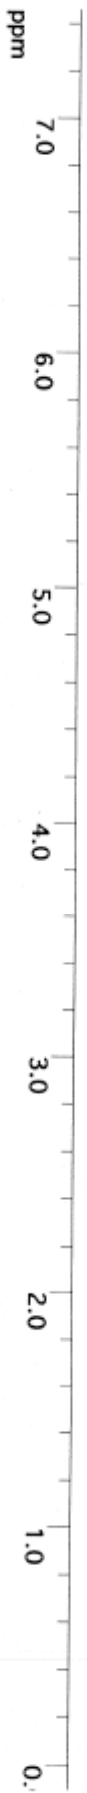

Nucleus C13  
Obs Freq 75.5736988  
FREQ 20000.0  
Acq. Points 8192  
FT Points 8192  
Acq. Time 409.6m  
Last Delay 200m  
Scans 1D 20000  
Scan Count 16668  
Dummy scan 0  
RCVR gain 7400  
temp K 0.0  
Sequence 1PULSE with Decoupl  
TX Power 60  
PW01 0.25  
LB 1D -53.21  
Phase 0 0.00  
Phase 1

### Compound II.a.4

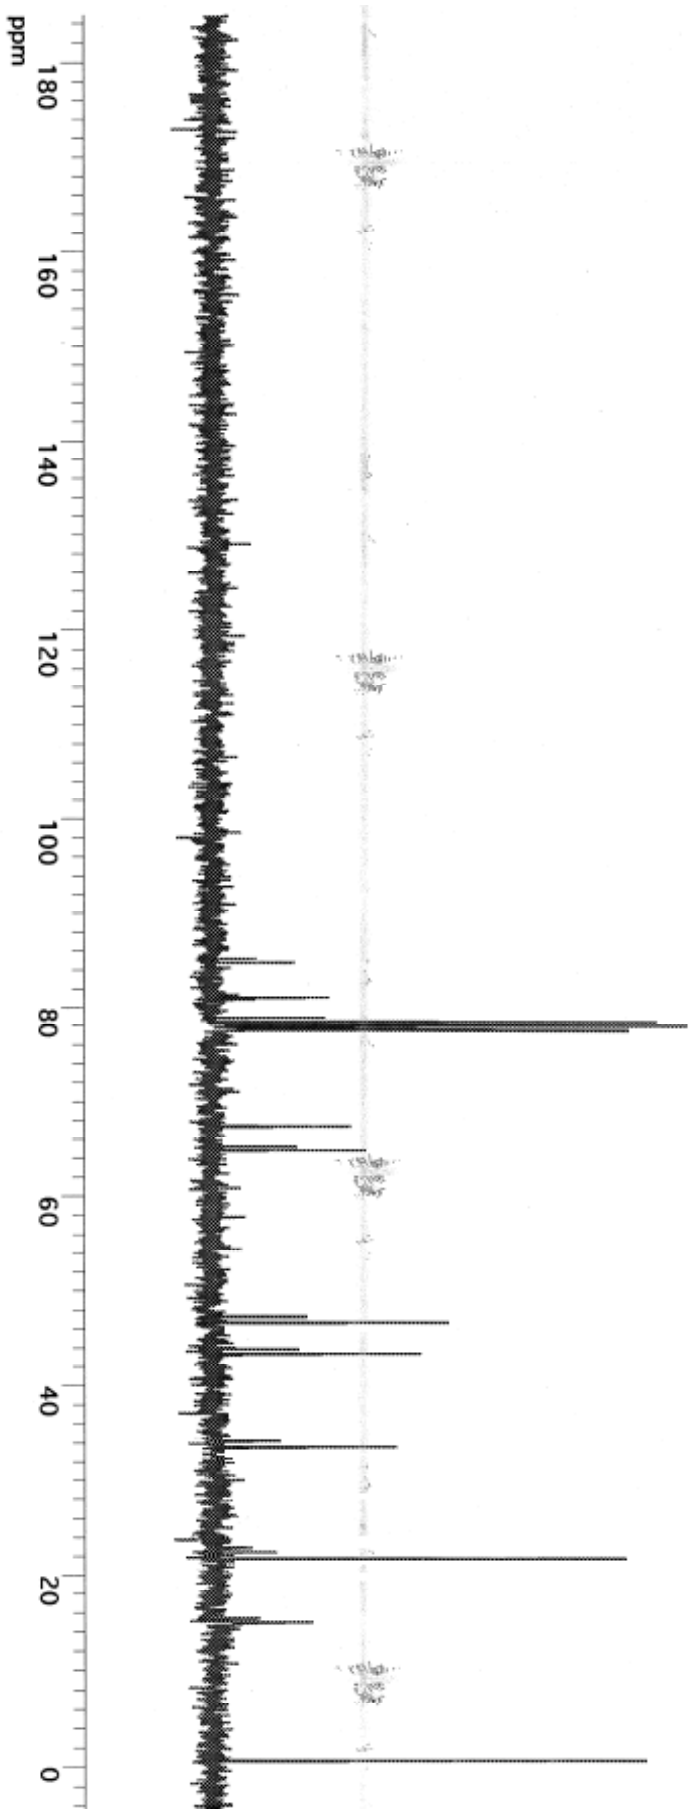

Nucleus H1  
Obs Freq 300.5216050  
FREQ 4000.0  
Acq: Points 8192  
FT Points 8192  
Acq: Time 2.048s  
Last Delay 1s  
Scans 1D 8  
Scan Count 8  
Dummy scan 0  
RCVR gain 150  
temp K 0.0  
Sequence 1PULS  
TX Power 63  
LB 1D 5.5u  
Phase 0 0.25  
Phase 1 -56.49  
-151.00

Compound III.a.1

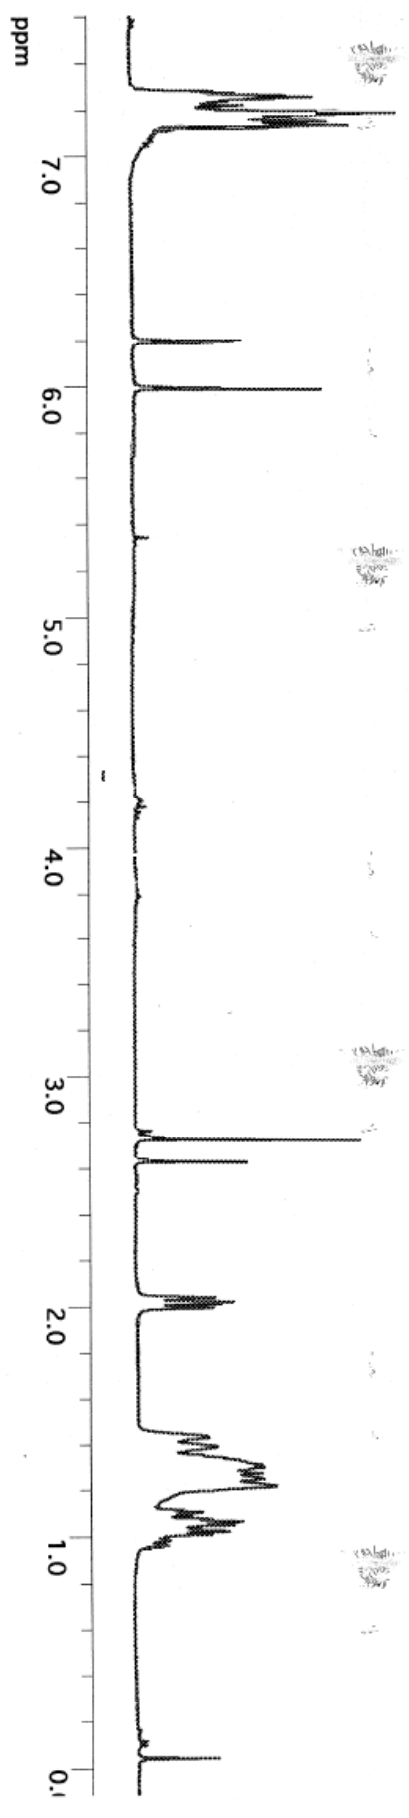

Nucleus C13  
Obs Freq 75.5736988  
FREQU 16000.0  
Acq. Points 8192  
FT Points 8192  
Acq. Time 51.2m  
Last Delay 200m  
Scans 1D 5000  
Scan Count 2000  
Dummy scan 0  
RCVR gain 9900  
temp K 0.0  
Sequence 1 PULSE with Decoupl  
TX Power 60  
PW01 0.25  
LB 1D -54.52  
Phase 0 54.00  
Phase 1

Compound III.a.1  
(mixture)

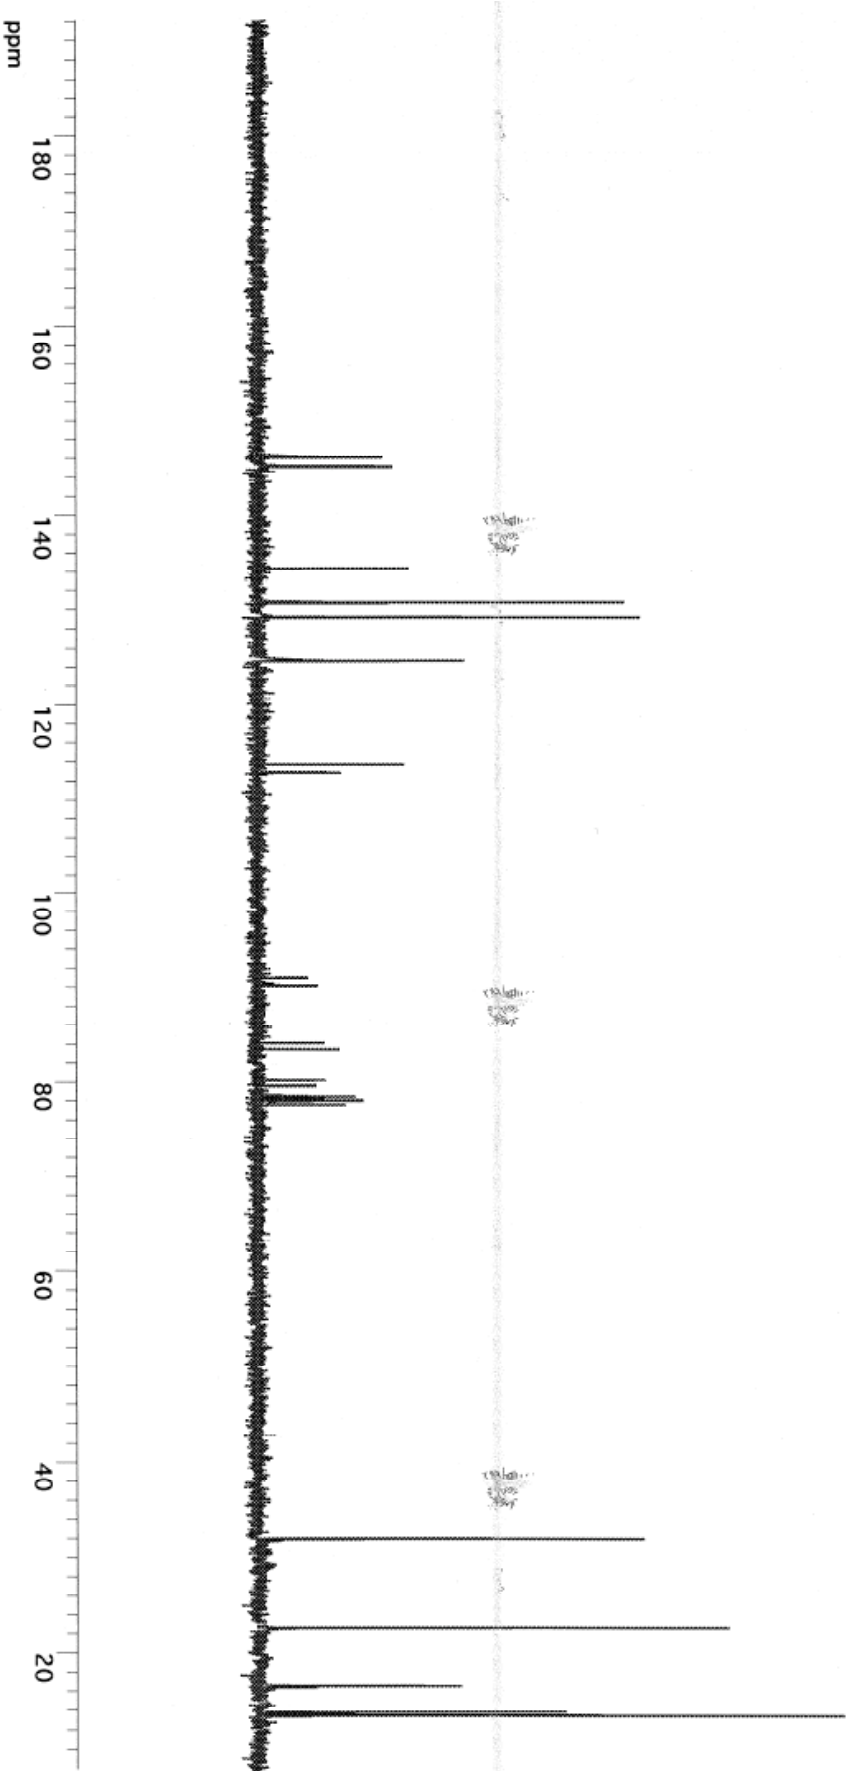

Nucleus H1  
 Obs Freq 300.5216050  
 FREQU 4000.0  
 Acq. Points 8192  
 FT Points 8192  
 Acq. Time 2.048s  
 Last Delay 1s  
 Scans 1D 8  
 Scan Count 0  
 Dummy scan 0  
 RCVR gain 600  
 temp K 0.0  
 Sequence 1PULS  
 TX Power 63  
 PW01 5.5u  
 LB 1D 0.25  
 Phase 0 -37.64  
 Phase 1 -165.00

Compound III. a.2  
 (mixture)

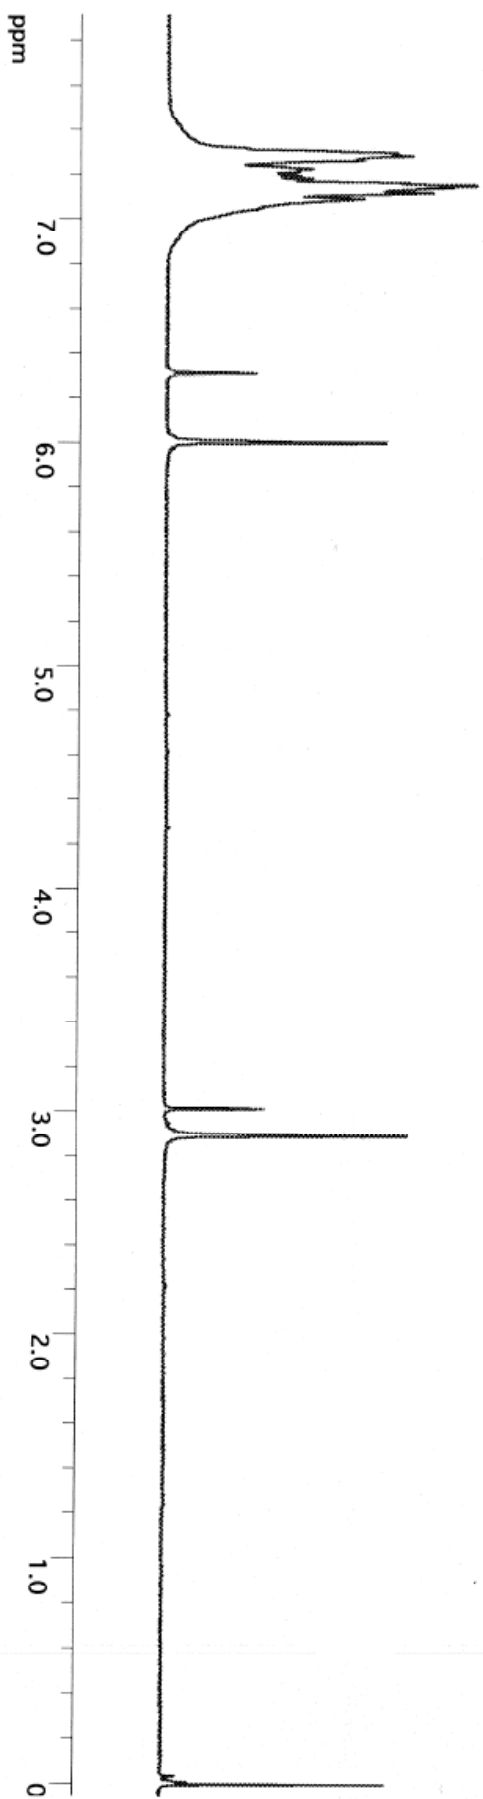

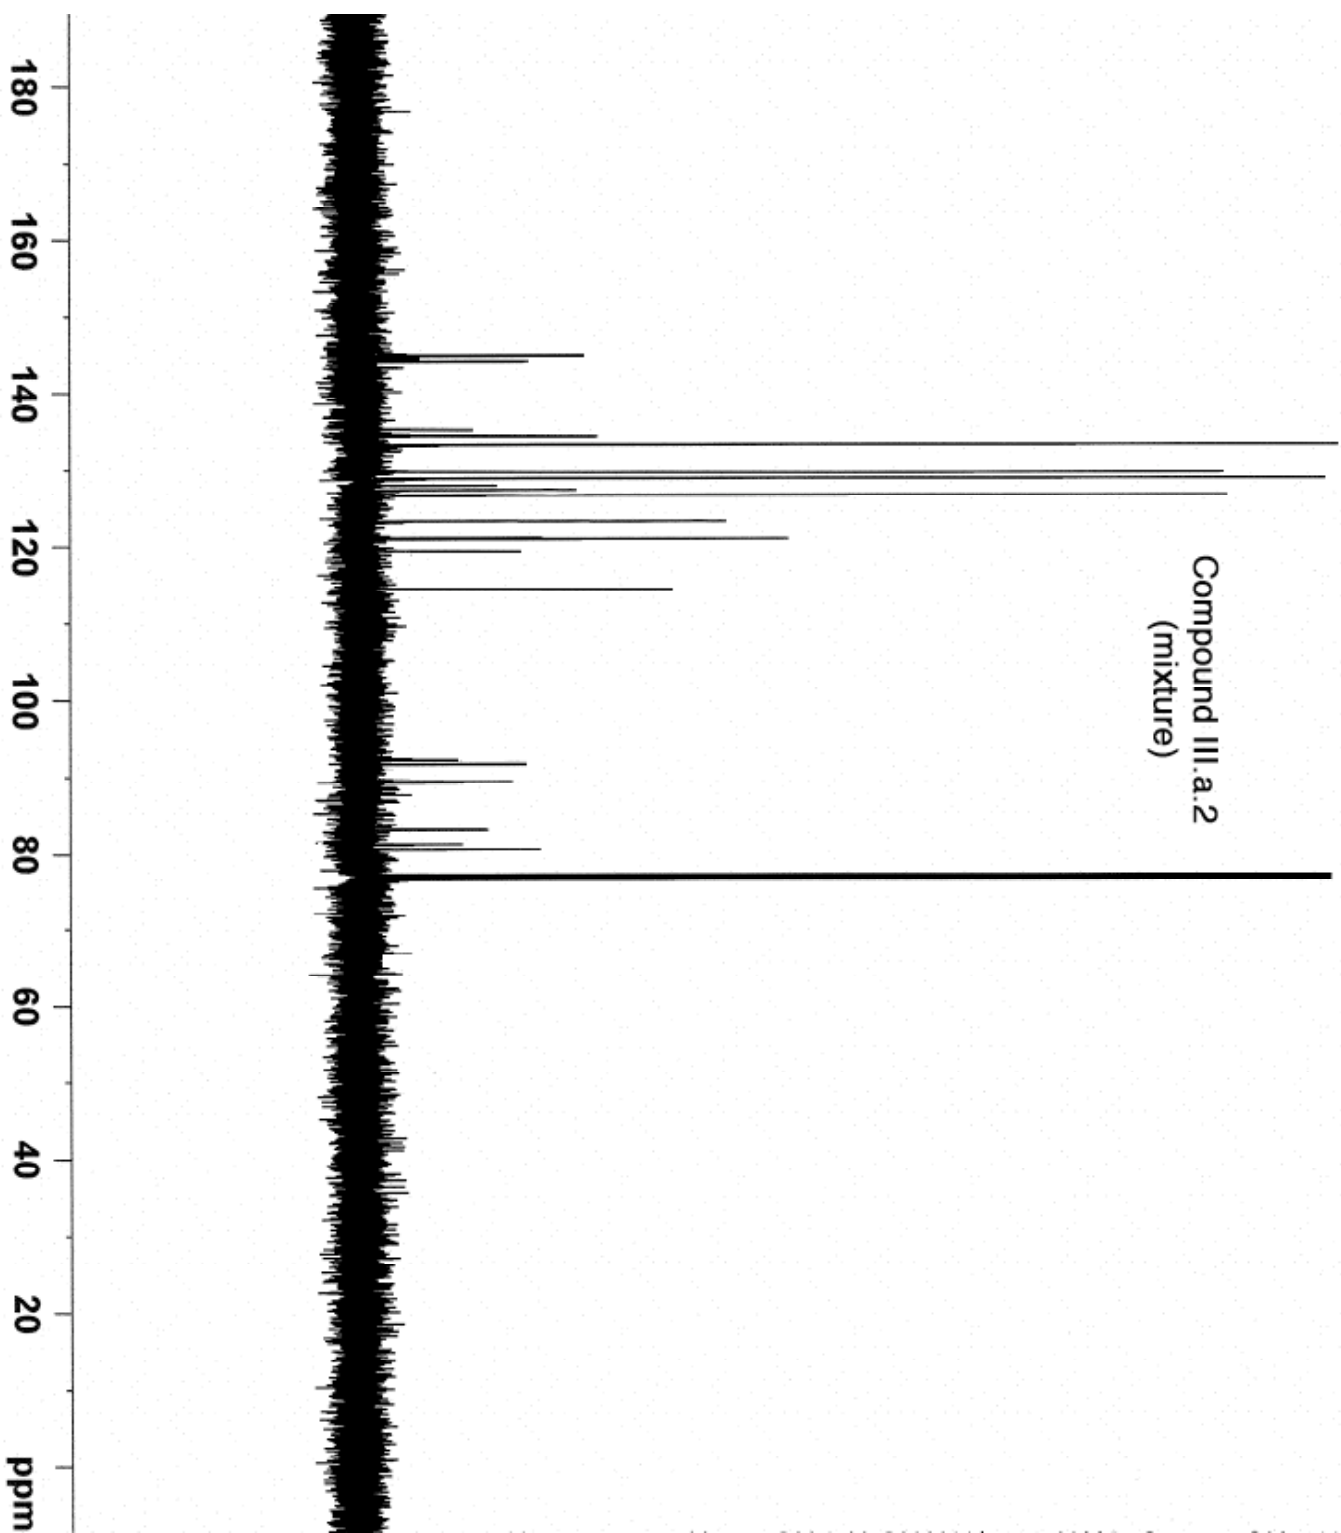

|             |             |
|-------------|-------------|
| Nucleus     | H1          |
| Obs Freq    | 300.5216050 |
| FREQU       | 4000.0      |
| Acq. Points | 8192        |
| FT Points   | 8192        |
| Acq. Time   | 2.048s      |
| Last Delay  | 1s          |
| Scans 1D    | 8           |
| Scan Count  | 0           |
| Dummy scan  | 0           |
| RCVR gain   | 600         |
| temp K      | 0.0         |
| Sequence    | 1PULS       |
| TX Power    | 63          |
| PW01        | 5.5u        |
| LB 1D       | 0.25        |
| Phase 0     | -37.64      |
| Phase 1     | -165.00     |

Compound III.a.2  
(anti-isomer)

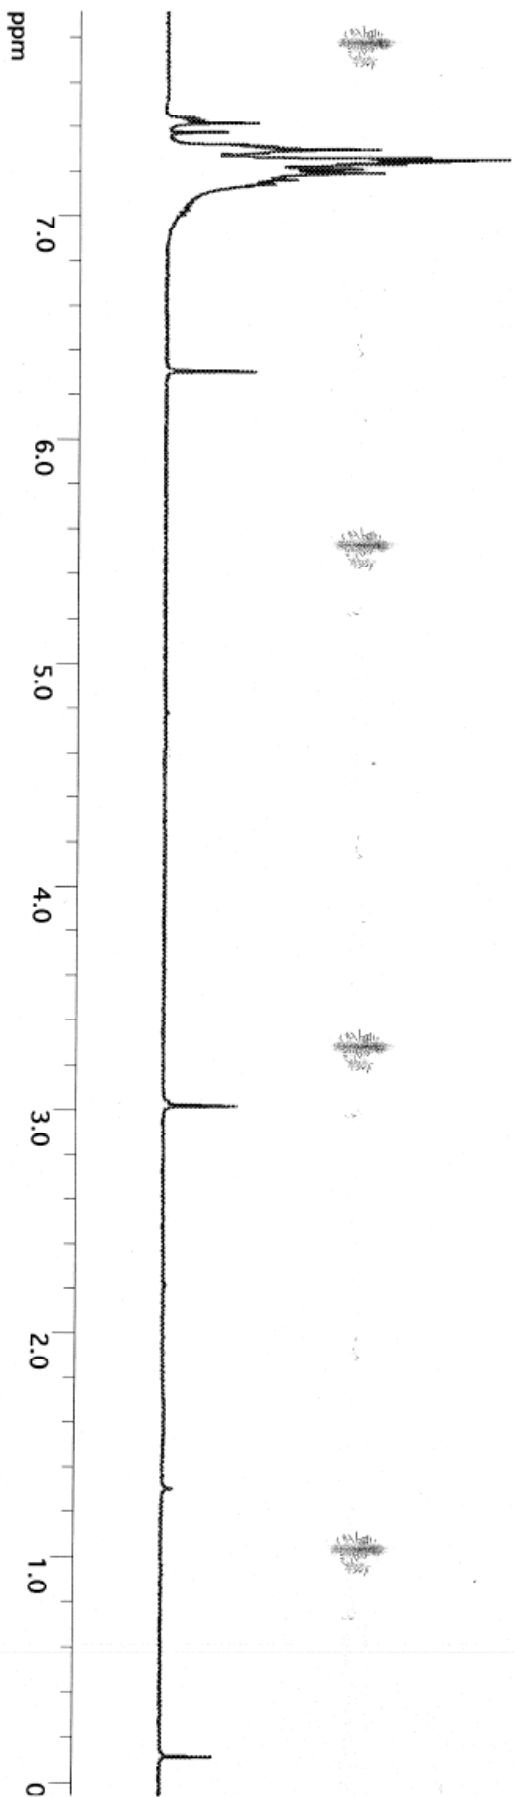



Compound III.a.2  
(anti-isomer)

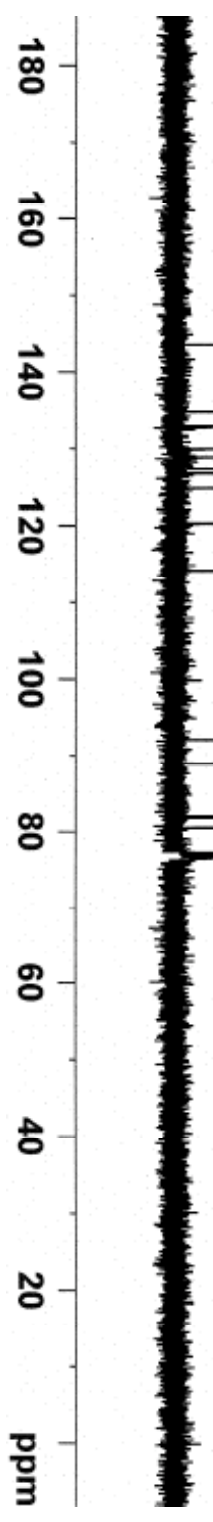

Compound III.a.3  
(mixture)

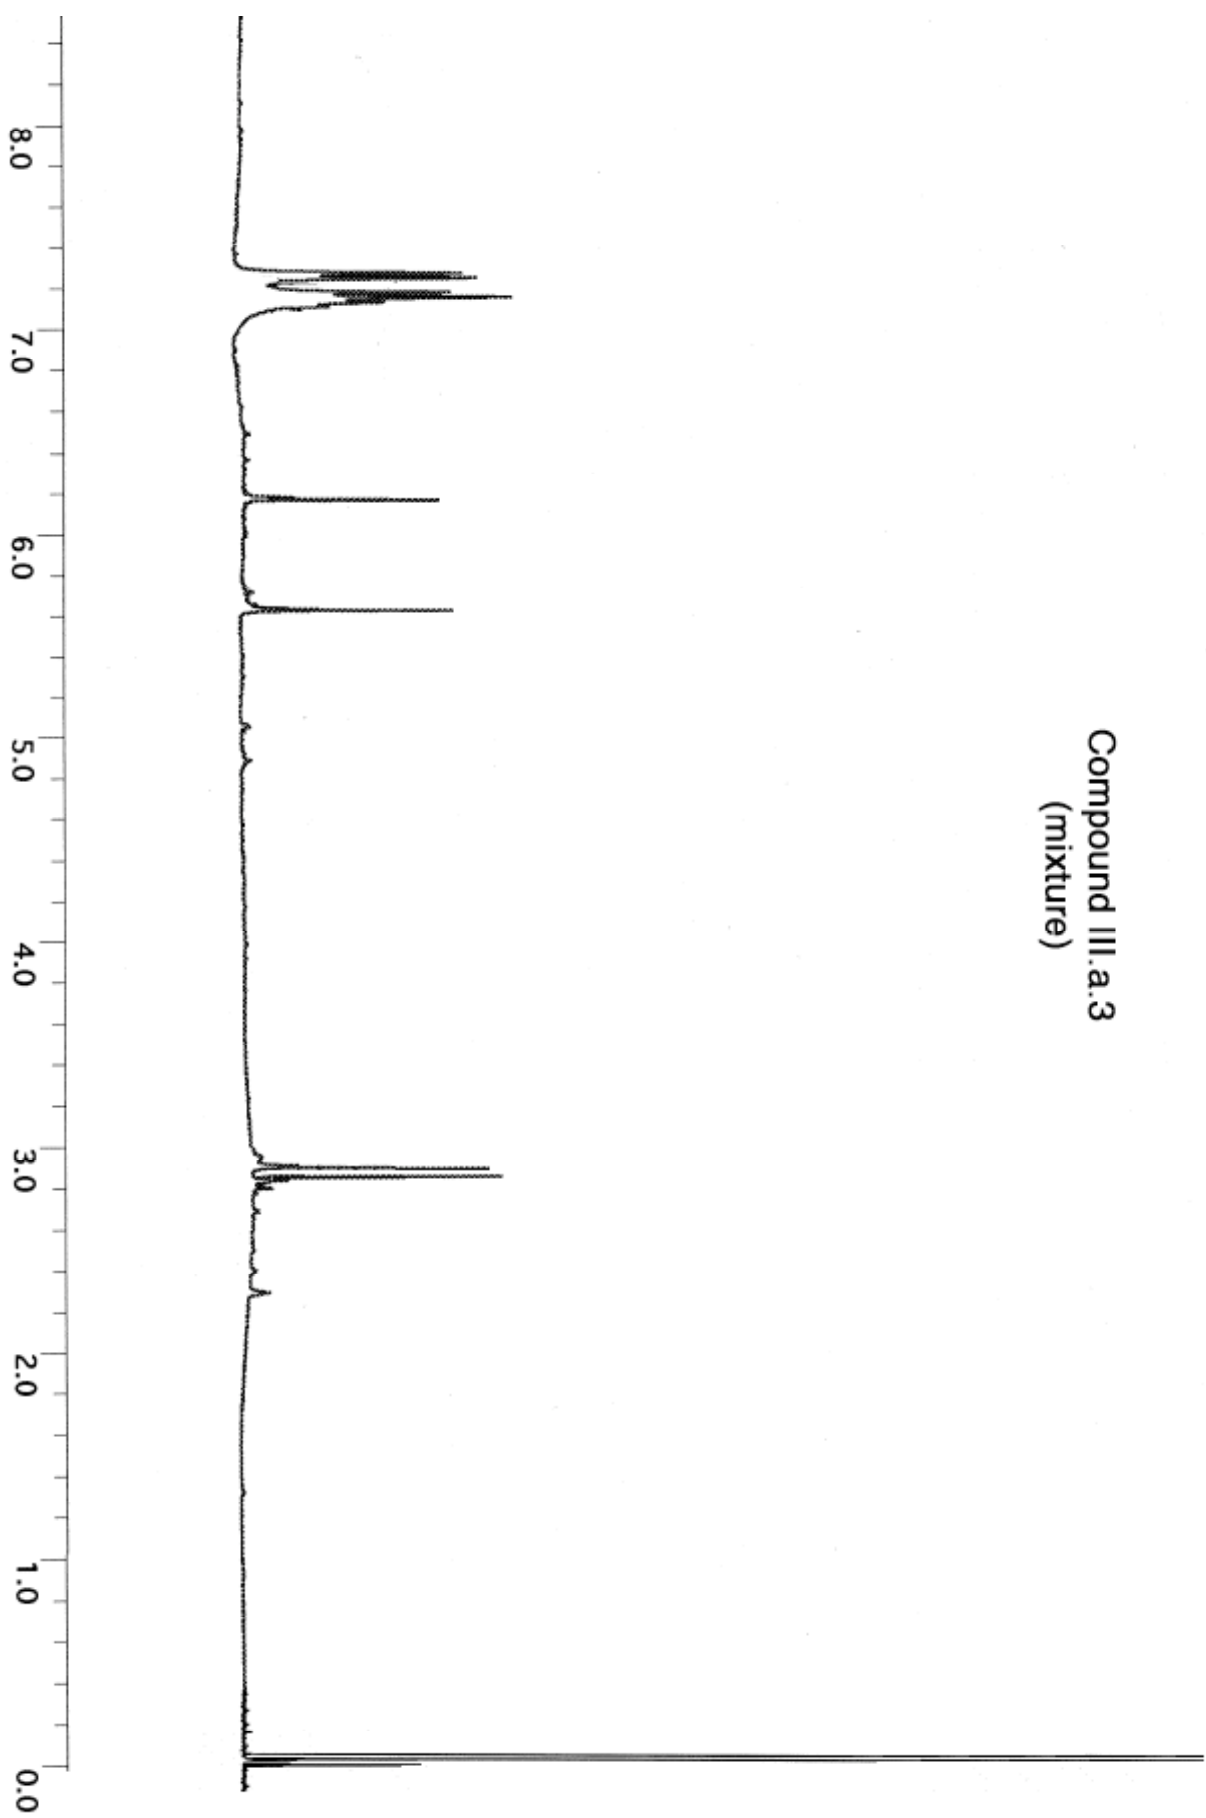

Compound III.a.3  
(mixture)

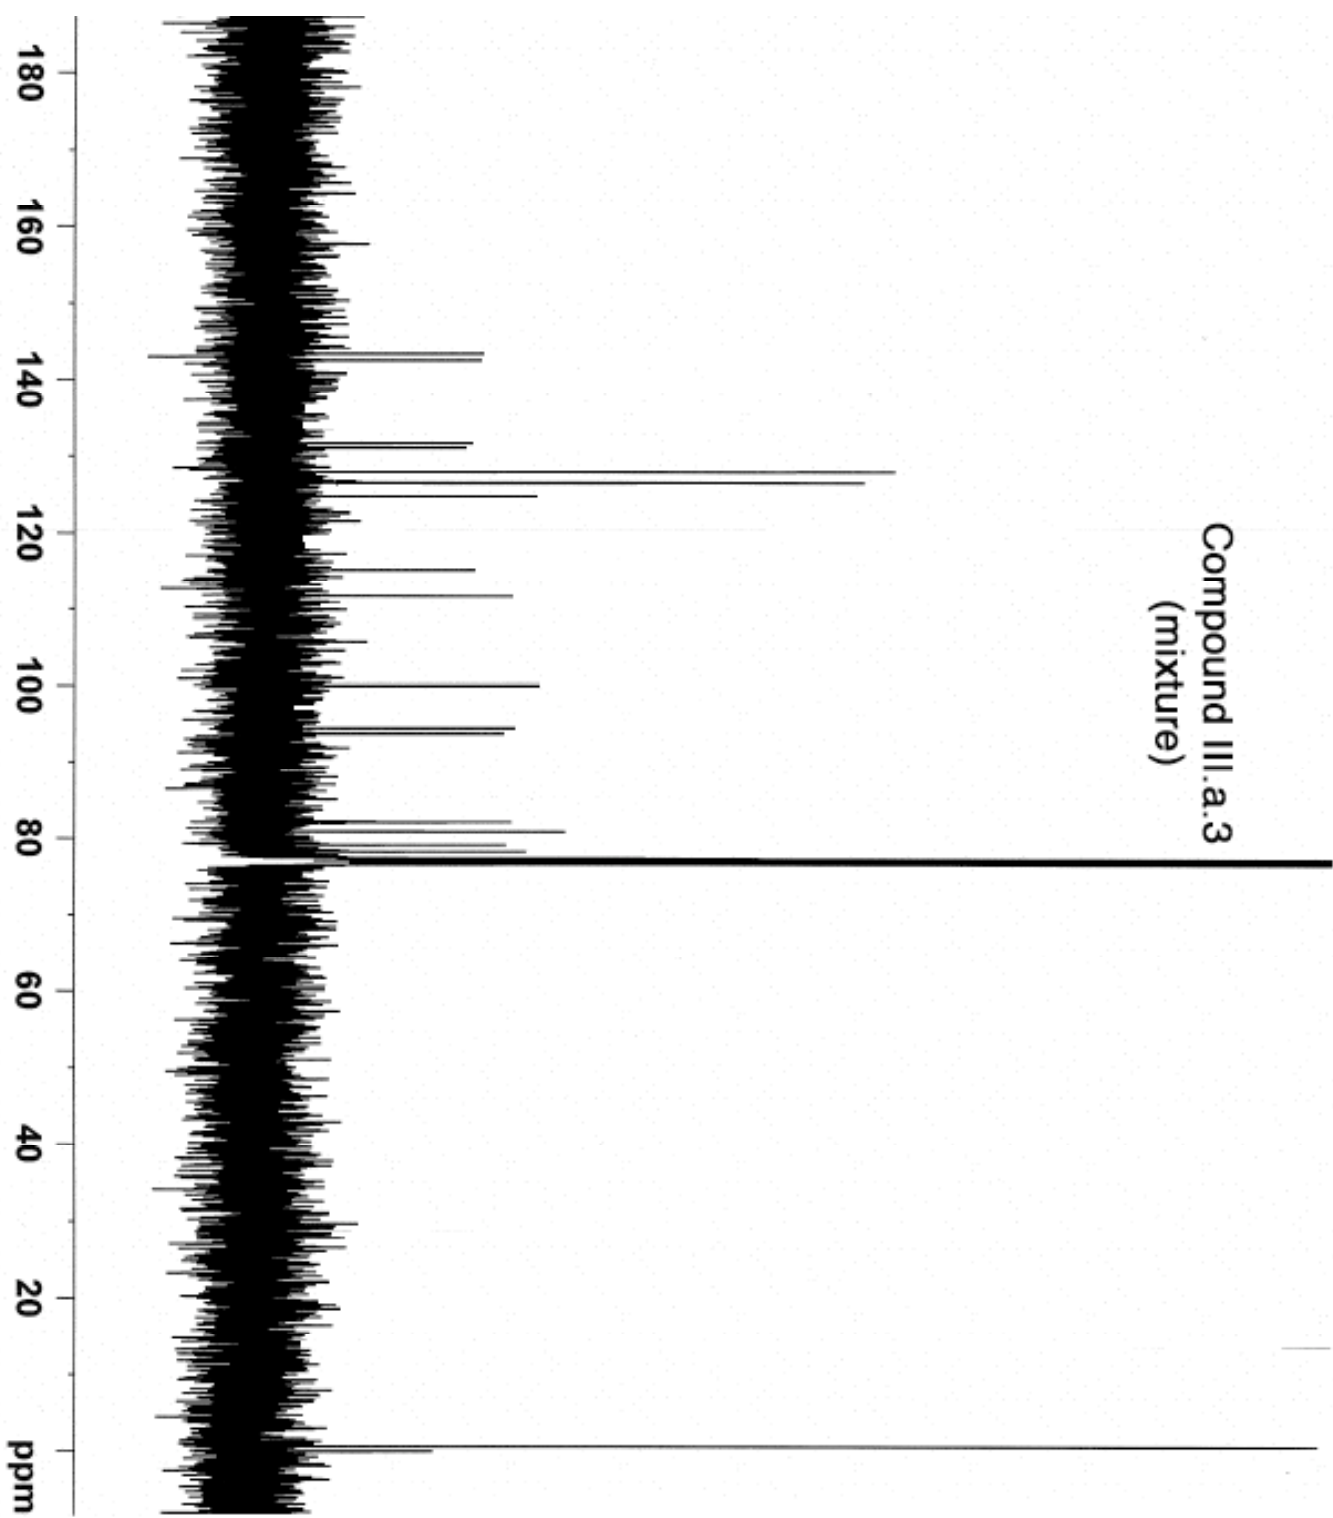

|             |             |
|-------------|-------------|
| Nucleus     | H1          |
| Obs Freq    | 300.5216050 |
| FREQU       | 4000.0      |
| Acq. Points | 8192        |
| FT Points   | 8192        |
| Acq. Time   | 2.048s      |
| Last Delay  | 1s          |
| Scans 1D    | 8           |
| Scan Count  | 0           |
| Dummy scan  | 30          |
| RCVR gain   | 0.0         |
| temp K      | 0.0         |
| Sequence    | 1PULS       |
| TX Power    | 63          |
| PW01        | 5.5u        |
| LB 1D       | 0.25        |
| Phase 0     | -58.34      |
| Phase 1     | -136.00     |

Compound III.a.3  
(anti-isomer)

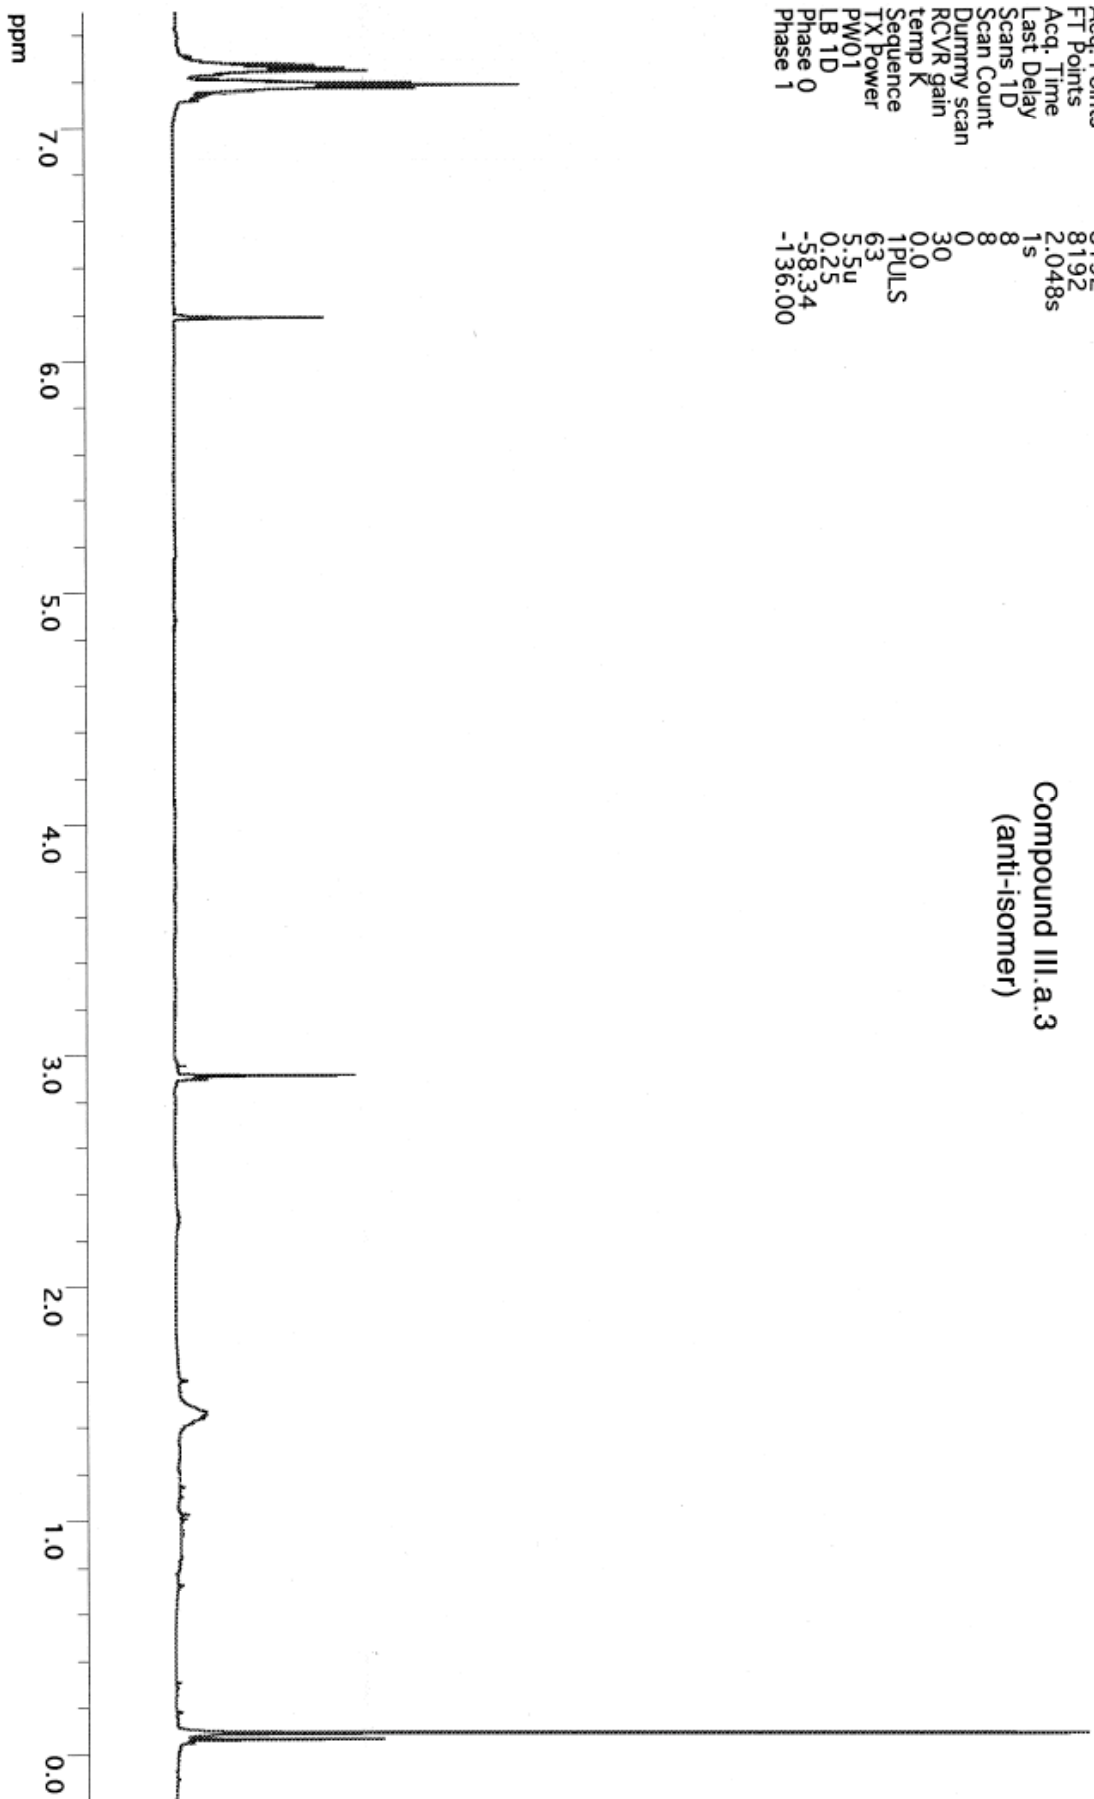

Compound III.a.3  
(anti-isomer)

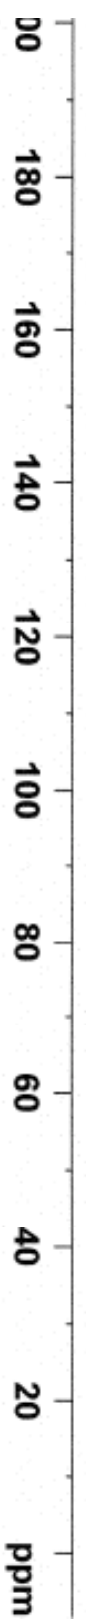

Nucleus H1  
Obs Freq 300.5216050  
FREQU 4000.0  
Acq. Points 8192  
FT Points 8192  
Acq. Time 2.048s  
Last Delay 1s  
Scans 1D 8  
Scan Count 8  
Dummy scan 0  
RCVR gain 30  
temp. K 0.0  
Sequence 1PULS  
TX Power 63  
PW01 5.5u  
LB 1D 0.25  
Phase 0 -58.34  
Phase 1 -136.00

Compound III.a.4  
(mixture)

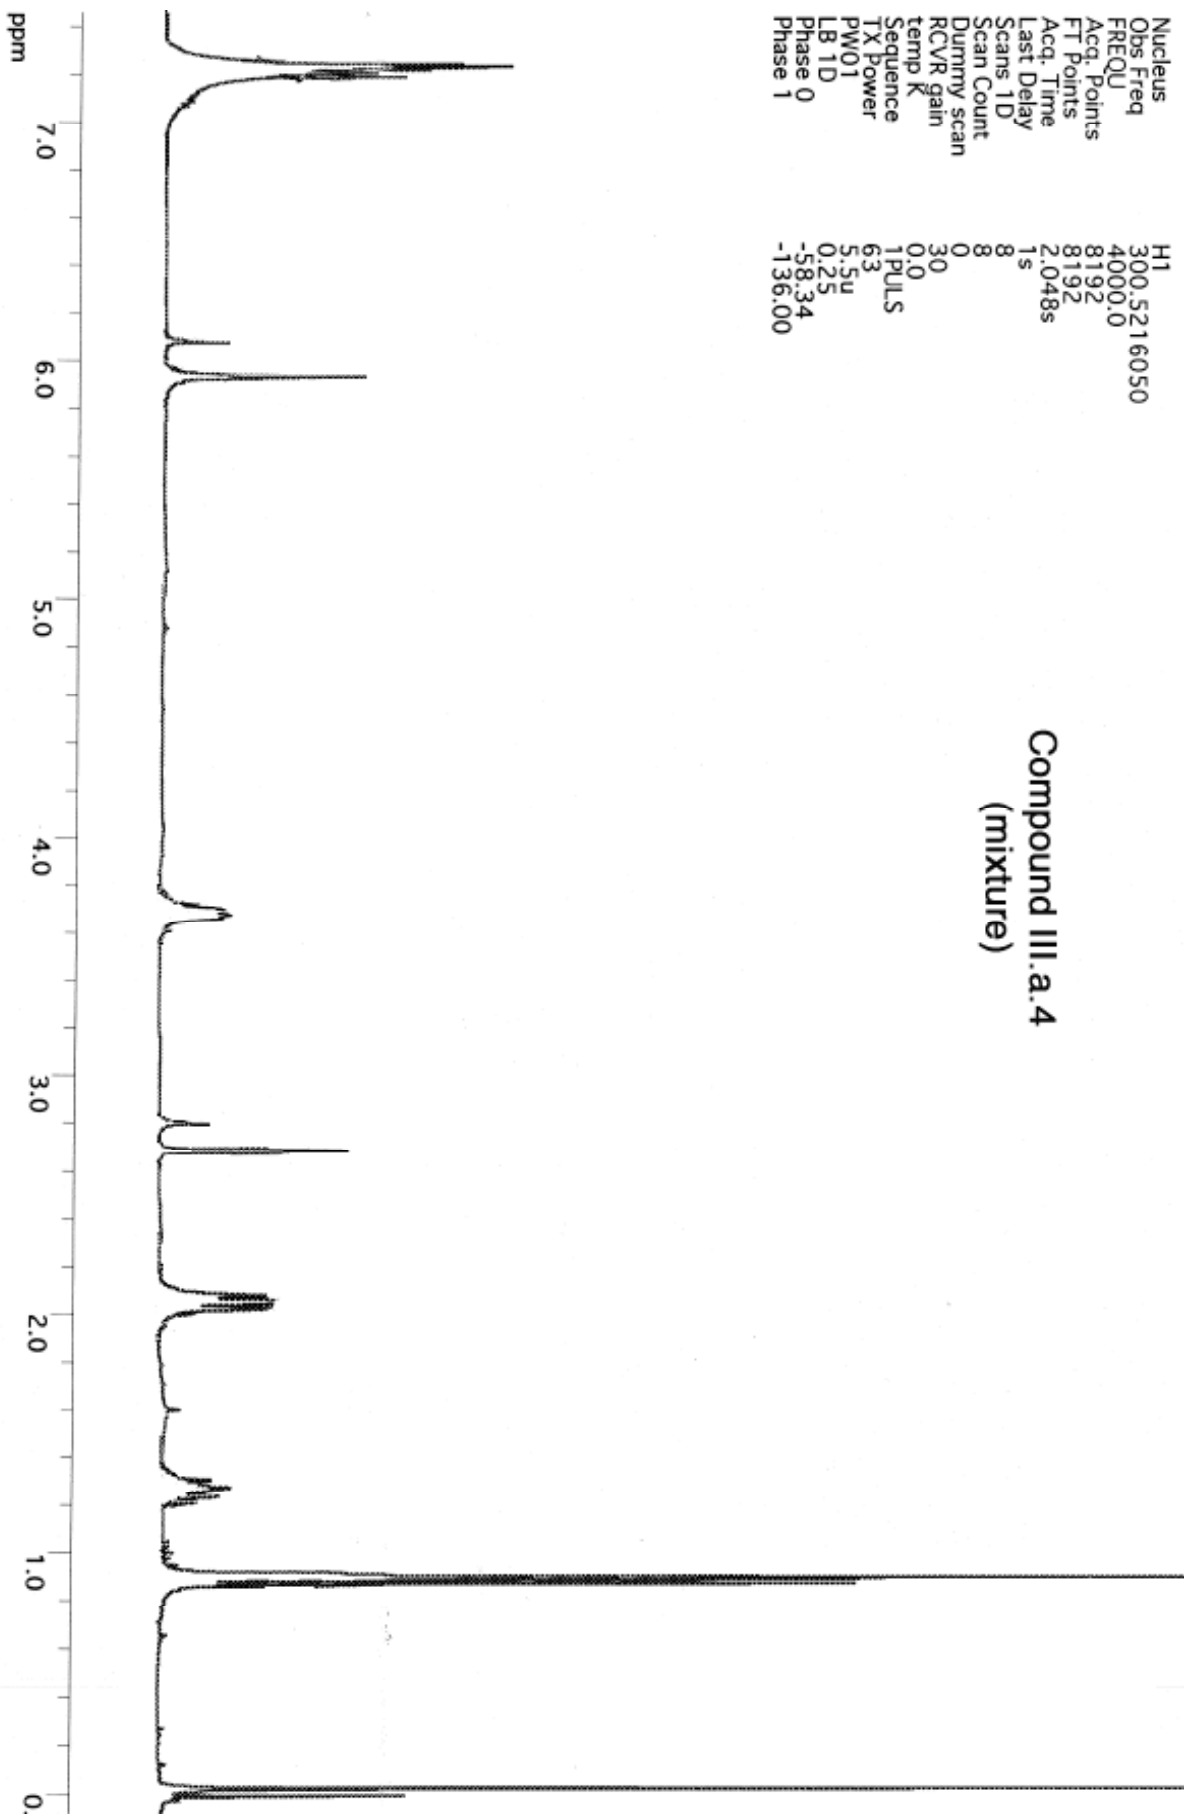

Compound III.a.4  
(mixture)

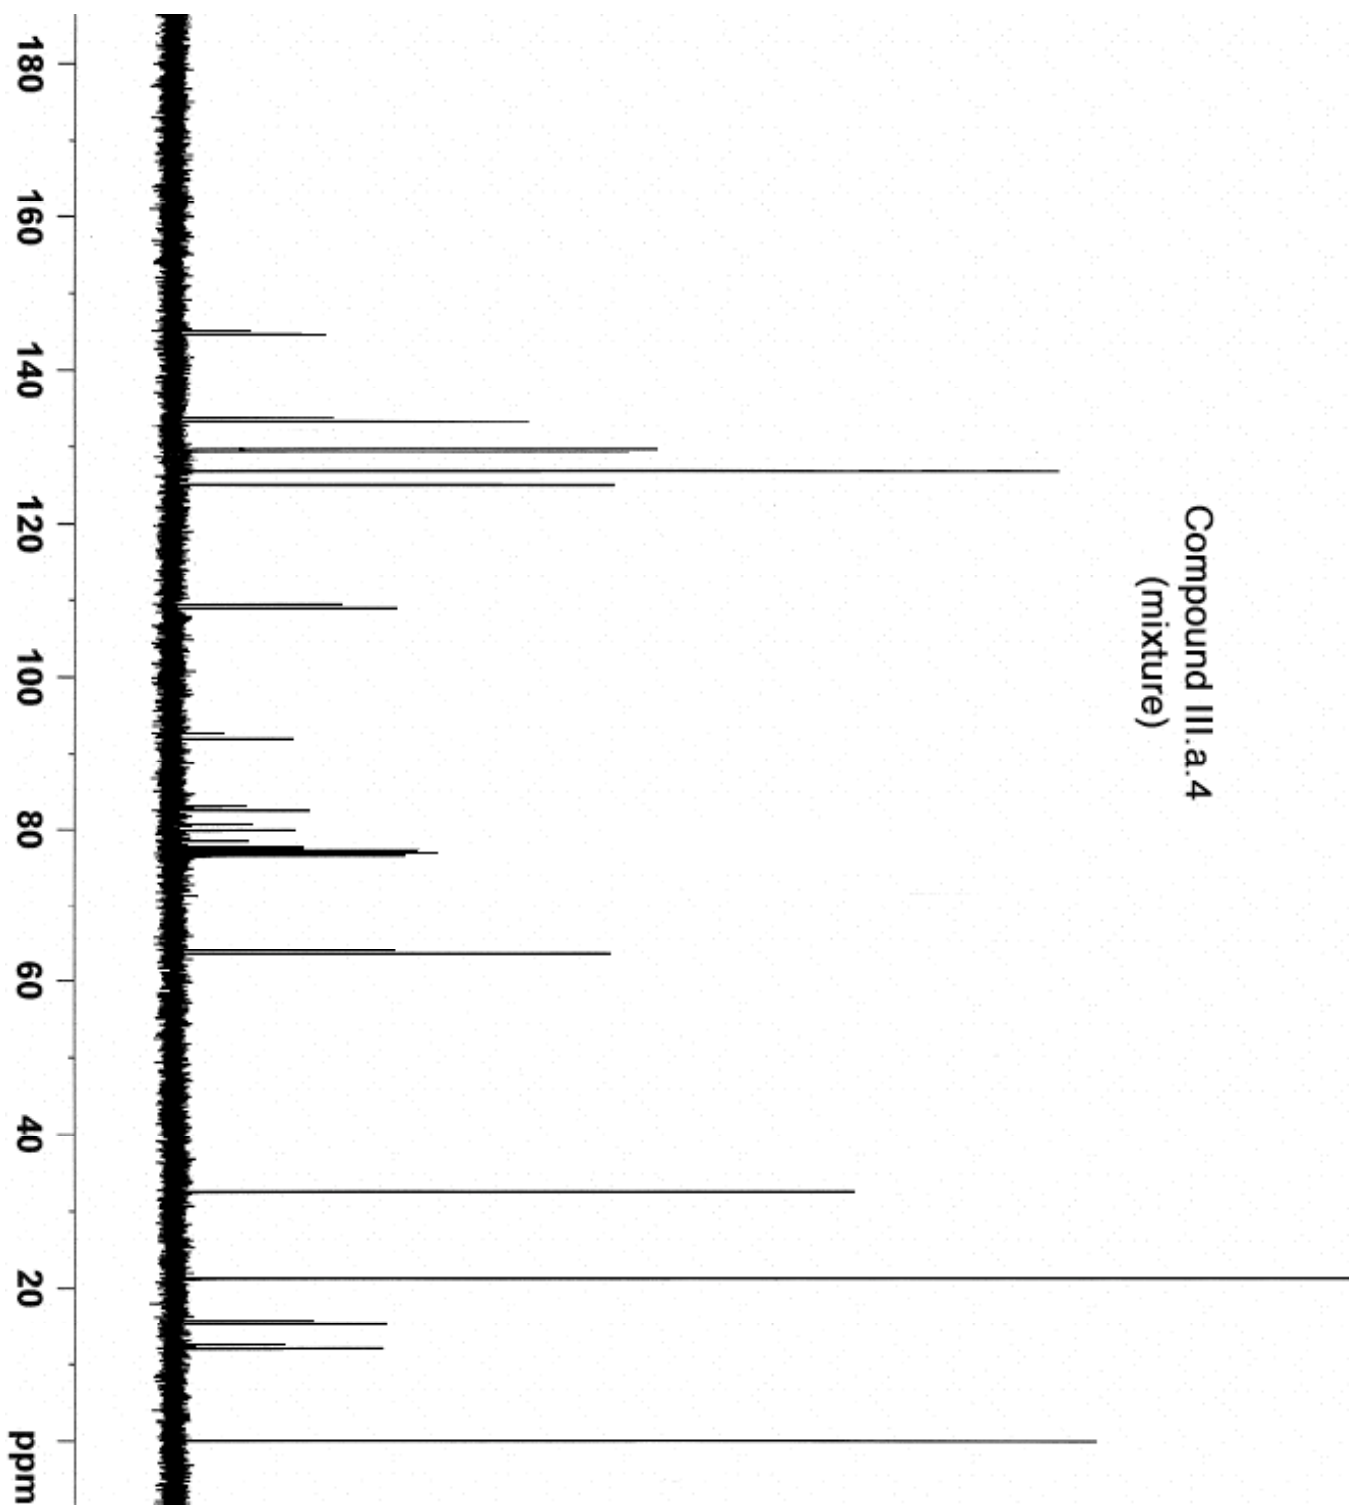

Supplement: jo900763u_si_001.pdf [file jo900763u_si_001.pdf]
